# Supplementary material for: A Pan-omics Systems Biology Perspective Identifies Calcium Signaling Pathway Critical in Medullary Thyroid Cancer
Source: Research Square preprint supplement (doi:10.21203/rs.3.rs-6926629/v1), 2025-07-27
Supplement: Supplementary file 1 [file 41a22991618fa90a0d82c816.docx]

| **Metabolic Pathways** | **Signal Transduction** | **Apoptotic pathway** | **Disease** | **Cancer** | **Cell–Extracellular Matrix (ECM) Interaction and Adhesion** |
| --- | --- | --- | --- | --- | --- |
| Biosynthesis of Unsaturated fatty acid | Calcium signaling | Apoptosis | Arrhythmogenic right ventricular cardiomyopathy | Thyroid cancer | Cell adhesion molecules (CAMs) |
| Alanine, aspartate, and glutamate metabolism | MAPK signaling pathway | Dilated cardiomyopathy | Pathways in cancer | ECM-receptor interaction |
| Central carbon metabolism in cancer | PI3K-Akt signaling pathway | Hypertrophic cardiomyopathy | Non-small cell lung cancer |
| Ras signaling pathway | Malaria | Transcriptional misregulation in cancer |
| PPAR signaling pathway |  |
| Neurotrophin signaling pathway |
| Adrenergic signaling in cardiomyocytes |
| Cholinergic synapse |
| Circadian entrainment |
| Inflammatory mediator regulation of TRP channels |
| Insulin secretion |

Supplementary Table 6: List of significant pathways in MTC categorized into their parent pathways (common at least to 2 omics data associated with MTC prognosis)
