# Supplementary material for: A Pan-omics Systems Biology Perspective Identifies Calcium Signaling Pathway Critical in Medullary Thyroid Cancer
Source: Research Square preprint supplement (doi:10.21203/rs.3.rs-6926629/v1), 2025-07-27
Supplement: Supplementary file 2 [file 5a0769305f91b46b61e32b62.xlsx]

## Sheet: Sheet1
Supplementary Table 7: Commonality analysis of DEGs and Kinases associated with the MTC pathogenesis to the calcium signaling pathway gene set
Calcium signaling pathway gene set (178 genes)	DEGs_MTC ∩ Calcium signaling pathway_gene set	Kinase_MTC ∩ Calcium signaling pathway_gene set
ADCY1	ADCY2	CALM1
ADCY2	ADORA2B	CAMK2D
ADCY3	ADRB1	CAMK4
ADCY4	AGTR1	PRKACA
ADCY7	ATP2A3	PRKCA
ADCY8	CACNA1B	PRKCB
ADCY9	CACNA1C
ADORA2A	CACNA1D
ADORA2B	CACNA1G
ADRA1A	CACNA1H
ADRA1B	CALM1
ADRA1D	CALM3
ADRB1	CAMK2B
ADRB2	CCKBR
ADRB3	CHRNA7
AGTR1	EDNRA
ATP2A1	EGFR
ATP2A2	ERBB2
ATP2A3	ERBB3
ATP2B1	GNA11
ATP2B2	GNAL
ATP2B3	GNAS
ATP2B4	GRIN1
AVPR1A	GRIN2C
AVPR1B	ITPR1
BDKRB1	LHCGR
BDKRB2	P2RX1
BST1	P2RX6
CACNA1A	PDGFRA
CACNA1B	PHKA1
CACNA1C	PHKG1
CACNA1D	PLCB1
CACNA1E	PLN
CACNA1F	PPP3CA
CACNA1G	PPP3CB
CACNA1H	PRKACB
CACNA1I	PRKX
CACNA1S	PTGER1
CALM1	PTGER3
CALM2	PTK2B
CALM3	RYR1
CALML3	RYR2
CALML5	SLC8A2
CALML6	SLC8A3
CAMK2A	TNNC1
CAMK2B	VDAC3
CAMK2D
CAMK2G
CAMK4
CCKAR
CCKBR
CD38
CHP1
CHP2
CHRM1
CHRM2
CHRM3
CHRM5
CHRNA7
CYSLTR1
CYSLTR2
DRD1
DRD5
EDNRA
EDNRB
EGFR
ERBB2
ERBB3
ERBB4
F2R
GNA11
GNA14
GNA15
GNAL
GNAQ
GNAS
GRIN1
GRIN2A
GRIN2C
GRIN2D
GRM1
GRM5
GRPR
HRH1
HRH2
HTR2A
HTR2B
HTR2C
HTR4
HTR5A
HTR6
HTR7
ITPKA
ITPKB
ITPR1
ITPR2
ITPR3
LHCGR
LTB4R2
MYLK
MYLK2
MYLK3
NOS1
NOS2
NOS3
NTSR1
OXTR
P2RX1
P2RX2
P2RX3
P2RX4
P2RX5
P2RX6
P2RX7
PDE1A
PDE1B
PDE1C
PDGFRA
PDGFRB
PHKA1
PHKA2
PHKB
PHKG1
PHKG2
PLCB1
PLCB2
PLCB3
PLCB4
PLCD1
PLCD3
PLCD4
PLCE1
PLCG1
PLCG2
PLCZ1
PLN
PPID
PPP3CA
PPP3CB
PPP3CC
PPP3R1
PPP3R2
PRKACA
PRKACB
PRKACG
PRKCA
PRKCB
PRKCG
PRKX
PTAFR
PTGER1
PTGER3
PTGFR
PTK2B
RYR1
RYR2
RYR3
SLC25A31
SLC25A4
SLC25A5
SLC25A6
SLC8A1
SLC8A2
SLC8A3
SPHK1
SPHK2
TACR1
TACR2
TACR3
TBXA2R
TNNC1
TNNC2
TRHR
TRPC1
VDAC1
VDAC2
VDAC2P5
VDAC3
