# Supplementary material for: A Pan-omics Systems Biology Perspective Identifies Calcium Signaling Pathway Critical in Medullary Thyroid Cancer
Source: Research Square preprint supplement (doi:10.21203/rs.3.rs-6926629/v1), 2025-07-27
Supplement: Supplementary file 3 [file 7845a4f710de425ee6d55eed.xlsx]

## Sheet: metabolomic data analysis_MTC
Supplementary Table 5: Significant KEGG pathways of human metabolomic studies associated with MTC (disease vs normal) (Adj P-value<0.05)
MTC_SERUM Tissue imaging and serum lipidomic profiling for screening potential biomarkers of thyroid tumors by matrix-assisted laser desorption/ionization-Fourier transform ion cyclotron resonance mass spectrometry	FDR	MTC_PLASMA Gas chromatography-mass spectrometry-based untargeted metabolomics reveals metabolic perturbations in medullary thyroid carcinoma	FDR
Glycerophospholipid metabolism	0.008247	Biosynthesis of unsaturated fatty acids	0.000402
Sphingolipid metabolism	0.15083	Arginine biosynthesis	0.005889
		Alanine, aspartate and glutamate metabolism	0.033063
		Valine, leucine and isoleucine biosynthesis	0.033547
