# Supplementary material for: A Pan-omics Systems Biology Perspective Identifies Calcium Signaling Pathway Critical in Medullary Thyroid Cancer
Source: Research Square preprint supplement (doi:10.21203/rs.3.rs-6926629/v1), 2025-07-27
Supplement: Supplementary file 4 [file a577a562513cfcb2ff962f6e.xlsx]

## Sheet: MTC_proteomics_pathway analysis
Supplementary Table 4: Significant KEGG pathways of human proteomic studies associated with MTC (disease vs normal) (Adj P-value<0.05)
MTC_SERUM Comparative analysis of the serum proteome profiles of thyroid cancer: An initial focus on the lipid profile	Adj P Value	MTC_TISSUE Quantitative Proteomics Analysis of Sporadic Medullary Thyroid Cancer Reveals FN1 as a Potential Novel Candidate Prognostic Biomarker	Adj P Value
Cholesterol metabolism	0.000161	Hypertrophic cardiomyopathy	5.48e-08
Cell adhesion molecules	0.007756	Dilated cardiomyopathy	5.56e-08
Complement and coagulation cascades	0.007756	Cardiac muscle contraction	2.22e-07
African trypanosomiasis	0.007756	Adrenergic signaling in cardiomyocytes	3.06e-05
Staphylococcus aureus infection	0.009289	Nitrogen metabolism	0.000412
Malaria	0.012486	Circadian entrainment	0.00567
Pertussis	0.03176	PPAR signaling pathway	0.011271
Vitamin digestion and absorption	0.03176	Arrhythmogenic right ventricular cardiomyopathy	0.011849
		Insulin secretion	0.017431
		ECM-receptor interaction	0.017431
		Calcium signaling pathway	0.018286
		Folate biosynthesis	0.02107
		Cholinergic synapse	0.040503
