# Supplementary material for: A Pan-omics Systems Biology Perspective Identifies Calcium Signaling Pathway Critical in Medullary Thyroid Cancer
Source: Research Square preprint supplement (doi:10.21203/rs.3.rs-6926629/v1), 2025-07-27
Supplement: Supplementary file 5 [file a6c7204c7f2aacb82e7d1e73.xlsx]

## Sheet: 3a DEGs in MTC
Supplementary Table 3a: Significant DEGs of human transcriptomic dataset associated with MTC (disease vs normal) (Adj P-value<0.05)
GSE27155	GSE196264
TSHR	CEACAM5
FGFR2	CHGA
KCNJ16	VGF
KCNJ15	SEZ6
MAFB	HOXB8
GPRC5A	PCSK1N
ZBED2	ADCYAP1
DEPTOR	NSG2
NRXN3	FOXA1
ALDH1A1	DDC
PAX8	RTBDN
MPPED2	CABP7
SLC26A4	CALCB
PLPP3	MIR7-3HG
PITX2	CHGB
DUOX1	ASCL1
DIO2	GFRA4
NCALD	ACTL6B
TUBB2B	SLC8A2
TPO	KLK11
CDC14B	UCN3
LIPG	CALY
RET	MIR595
LY75	PHYHIPL
CRYBG3	DRD2
GAP43	DNER
FOXE1	ST8SIA3
MLLT11	SYT1
ANXA1	SIM1
FOSB	CAPN13
CAV2	UNC13A
ADGRL2	MARCHF4
BMP7	CEACAM6
KCNH2	SLC2A12
KCNQ1	NEFL
PRKCQ	FABP6
GRIA2	SCGN
ITPR1	INSM1
SORD	UNC79
KLHDC8A	SMIM32
LPL	CPLX2
PLS3	AOC1
NEFL	KCNK12
MT1F	CYP3A5
ZFPM2	NKAIN2
PPIC	FGF14
B3GALT2	PHACTR3
IQGAP2	SCG2
ID4	CELF4
PTPRO	ASPHD1
MDFIC	RIPPLY2
LGR5	NRSN1
SQRDL	LUZP2
GP2	ISL1
LDHB	KCNF1
ACSF2	INA
EGR2	RUNDC3A
KIAA1644	TAGLN3
FRMD4B	PRMT8
NOTCH2	SCG3
CAV1	SRRM4
CAPG	RET
COL4A3	SEMA3E
FOLR1	SYT4
CTNNAL1	TGM3
SPOCK1	ESPN
VEGFC	TMPRSS6
SNAP91	ANK1
TRIB1	CCDC33
P4HA2	CST1
HGD	TMEM132D
MAP1B	CACNG2
C14orf132	CPA4
CRYZ	MAPK8IP2
SLC4A4	FMO5
YBX3	GRIN1
C1orf115	TTR
IRS1	GPX2
PHACTR2	PPP2R2C
ARAP2	SNAP91
FOS	BARX2
GABRR1	BAALC
MEG3	HCN1
CEMIP	BRINP1
GATM	PTPRN
ARHGAP6	SYT13
FRMPD1	LGR5
GBP1	GRIA3
NOTCH2NL	PIPOX
ACOT7	KCNB2
CHST11	LIN28B
HOXB6	SYP
DUOX2	SPTB
CLDN8	SIX2
PCDHA1	HPGD
FZD1	ZNF831
MTARC2	C9orf152
CHN2	ADARB2
AMPH	KCNH2
CYR61	AMPH
WWC1	CNTNAP2
JUN	CALCA
CWH43	TMEM63C
CDH3	TMEM151A
ALPK3	TNR
TGIF1	GRP
CEACAM6	PCSK1
SLC1A1	NMNAT2
DNAJB4	HCN2
LOXL2	PITX2
CLIC3	GABRR1
BAMBI	TUSC3
CPEB1	CAPN9
ENPP1	GRM8
NMNAT2	TMEM145
GJA1	SYNGR4
PTPRN	LRRC26
RGS16	GIPR
CHL1	LRRIQ4
PDGFC	CA8
CALY	RTL4
TSPAN6	SAMD5
MTARC1	HOXB7
ST6GALNAC2	GNG3
ATF3	TOX3
DPYSL3	VTN
SPTLC2	PROC
PGBD5	PSG4
GLS2	B3GALT2
KIT	SEZ6L2
CYP3A5	GAP43
ZFP36L2	SNORD113-8
ETV5	PAX9
PRRG1	HOXB3
NUPR1	INSC
SLC2A10	FRMPD1
SCN9A	ST18
ANK1	SLC8A3
EYA2	FGF12
TAGLN3	GCH1
FBN1	SLC6A17
MDK	F7
CSRP2	FXYD3
AZGP1	REEP2
LRRC2	DNAJC12
TMX4	SCIN
CHRDL1	CNTN1
SYBU	NRXN1
DFNA5	CAMK2N2
PPARGC1A	PTPRN2
ZNF174	MYT1
NPR3	DUSP26
HOXB7	ASPDH
MTUS1	PCBP3
HLA-DMB	ANO4
DNAJC6	TSHZ2
SLC12A8	GALNT13
KCNE4	CTXN2
FABP4	SLC18A1
RNFT2	SOX11
INSM1	IRX2
SCN1B	TMEM184A
ARRB1	TUBB2B
SMPDL3A	CNNM1
RHOBTB3	PDIA2
ATP2A3	ASB4
FMO5	LRFN2
KIF1A	RALYL
RAB23	SNORD114-30
NFASC	HOXB5
ABR	SNORD113-2
ABCC8	ARHGDIG
CRMP1	CHD5
CRIM1	ZDHHC22
METTL7A	SCN9A
MET	OTOP3
DUSP4	FAM155A
ACKR3	PCDHAC1
SEZ6L2	CRMP1
KCNAB1	PEG10
MINA	MISP
PDE4DIP	CDK5R1
GAB2	P2RX6
HOXB2	APLP1
C16orf45	KIRREL2
MPZL2	FAM178B
PKNOX2	ARFGEF3
ACADL	DSCAML1
ZFP36L1	HOXB2
EFEMP1	MIR770
GPR183	UNC5D
CTSB	FAM166C
OPN3	KCNK3
ADGRA3	FGF9
SNTG2	AGMO
SMPD3	SVOP
FGF14	SOGA3
WWTR1	CARMIL3
APOL1	AGR2
GPM6A	TOX
HEBP1	SNORD113-5
TG	CALN1
CDK5R2	NAT16
CTGF	LIPH
TRIB2	ADAMTS18
RAP1GAP2	PAH
SSPN	MEIOB
ARL4D	SNORD114-3
INA	GNAO1
CCND1	CELF5
IMPA2	AKR7L
FGL2	AKR7A3
DDIT4	SNORD114-4
CD44	SNORD113-3
SEMA5A	CACNA2D2
FABP6	CEP41
MT1X	SCAMP5
DIRAS3	ONECUT2
DNM1	MMP16
TBC1D4	SYN1
GALNT3	BMP5
SIM1	MIR370
SNAP25	STRA6
FAM189A2	LDLRAD1
GLYR1	GRM4
AGPAT4	CABYR
MXD4	LGALS3BP
PRKACB	SPTBN2
SYT1	HCRT
EPB41L3	RAB26
PLCH1	MACC1
LPAR1	LINC00887
MYOF	MTUS1
SNTA1	FAM83E
CELF3	CHRNB2
MAP3K12	SNORD113-7
MB	LHFPL5
APLP1	SPOCK1
CDC42EP3	PCDHA9
SEL1L3	CELF3
ADGRE5	GREB1
L1CAM	MMP11
BLNK	PLEKHG5
RGS2	JAKMIP2
TRIM58	CPA5
SLC18A1	SLC44A5
SEMA3E	GOLT1A
PHF11	AP3B2
ST3GAL6	CLNK
SLC20A2	NRXN3
VGF	MAPK10
NFIB	SNORD114-13
INPP5F	SYT7
RIMBP2	SEC11C
PRSS8	AFF3
TOX	SNORD114-11
NRXN1	JAKMIP1
ANXA2P2	SNORD114-2
ITM2A	CCKBR
ALDH1B1	STPG3
QKI	IGSF21
CD36	SNAP25
TNFAIP2	MTCL1
NR4A1	RPL31P11
TMEM176A	ADAMTS6
CADPS	GABRB3
MT1H	ANO9
PON3	SSTR5
FAM107A	CACNA1B
CPVL	C2CD4C
UCHL1	KIF5A
FOXA1	GPRIN1
FAM83E	PAK3
NEFM	CACNA1C
EFNA4	ASB16
MT1G	PRUNE2
TMEM243	PAQR6
RPS6KA3	ACOT7
NOVA1	VWDE
ST18	MMP24
PRDX1	CLDN9
TNS3	DPYSL4
INPP5J	SPTLC2
CD52	MGAT5B
MAPRE3	PLXNA4
NPTXR	FAM81A
PLEKHO2	COPG2IT1
GYG1	DCX
CHD1L	TNFRSF25
GRAMD3	ARSJ
SNX5	CHN2
AP3B2	GNG2
SVIL	SNTG2
KLC1	CADPS
F5	ATP1A3
IDS	WNK2
COL8A2	RIPPLY3
CD55	B3GNT8
GNAS	CHD1L
HSD17B6	CIT
COL4A5	BIK
MT1HL1	PLEKHA6
BHLHE41	AJM1
FOXO1	SLC4A3
SGCD	PCDHAC2
GCSH	CST2
PTPRN2	KIF1A
CACNA2D2	AMER3
GRM7	NECTIN1
PLCL2	HID1
DHRS3	RTN2
RUNDC3A	SV2A
GPR19	HOXB4
HAGH	RAB3C
EPHA4	LFNG
SLC35A3	HMGCLL1
LFNG	HS3ST6
CDK5R1	PTPN20
NPDC1	RGS11
EFS	GUCY1A2
NTRK2	CARMIL2
RCAN2	ASIC3
CHST1	NPTXR
CHPT1	GOLM1
PHLDA2	JAKMIP3
CDH16	DUSP4
DOPEY2	MRAP2
PRKX	MAP1B
ANOS1	MEG8
GDF15	WFIKKN1
QDPR	TGFA
CHRNA3	TMEM121B
HOXC6	SLCO5A1
TNFRSF21	SDK1
RFTN1	MXI1
EDN3	EEF1A2
PRKCI	PNMA1
TBC1D30	PACSIN1
TTC9	LRATD1
SCGB2A2	PRR36
PCP4	SNORD114-1
JAG2	ABCC8
GCH1	FAM171B
AOX1	C3orf14
BARX1	RBM38
WFDC2	RASD1
RAB20	MARCHF3
CTSC	ATP2A3
HIP1R	MEIS2
LAT2	SCN3B
BSN	SNORD112
PIEZO1	SLIT1
SEMA4C	SNORD114-17
ISCHIP1	TUBB3
CSGALNACT1	BEST4
CAMK2B	SNORD113-9
HOXB5	PCDHA4
STC1	DLG4
ANXA2	KCNB1
SPRY4	LRP11
TMOD1	SRRM3
CBS	MAP6
MLLT3	PSD
CANT1	MIR153-2
NRCAM	NPDC1
RXRG	SOX5
MBD2	DNAH5
AMOTL2	KLF12
IL15	EFCC1
CLN5	DISP2
LTBP2	ANKRD36
SLC38A1	LRRC75A
SAV1	COL10A1
TMEM59L	SCN8A
RIMS2	AATK
MEST	PON1
SYNGR3	STMN1
SAT1	RBP1
LMOD1	SNORD114-27
ANK3	SMPD3
SCN3B	CDK5R2
DUSP26	RAP1GAP2
DCX	GDAP1
IFNA17	KCNK17
IQCK	TANC2
EPHB6	GPR158
PSEN2	MANEAL
VIM	LRRC34
WIPF1	GAB2
TRAK2	MYO15A
ZCWPW1	GINS2
OSBPL3	NOVA1
CCKBR	GGT7
SCRN1	BAMBI
ZNF804A	LIN7B
S100A1	SYBU
ZNF185	RNF183
KLK11	SYT17
SLIT1	CACNA1H
GINS2	TTC9
IFI44	NOXO1
DNAJB5	STX1A
RYR2	OR13A1
HOMER1	SPTBN4
CIT	TMEM176A
DNAJC12	NCALD
RHOQ	MTMR7
FBXO41	SLC12A5
RAP2B	DAGLA
TFF1	NOL4
GULP1	CKMT1B
PLA2G7	SYT5
SLC1A4	PRKAR2B
PRKY	CACNB2
TMEM176B	BRSK2
FAT4	GNG4
P4HTM	CAPN12
SGK3	SEMA4D
CCHCR1	NAPB
SLC8A2	NOS1AP
ADORA2B	ZDHHC11
CCL21	KIAA0513
CDH5	VWA7
TGFA	BEX1
DUSP1	LYSMD2
LPCAT4	CELSR3
KCNK3	BSN
IL6R	SLC1A4
BMP2	CDH2
STATH	STARD10
PLP2	NT5DC3
KLF11	SPRED3
OSBPL10	ALPK2
HES1	PRKACB
NOV	CPEB1
SLC27A3	CHDH
CTBP2	NPW
SDC2	LRP4
CTNND2	NAAA
DOK4	HOXB6
DUSP14	ESPL1
DRD2	BCR
SMAD6	PODXL2
BBOX1	RNF152
GLRX	MIR744
STXBP1	PKD1
CLIC2	FMN2
ABHD2	KCNC1
FAM155A	POSTN
ASPH	MADD
HOMER3	C2CD2L
GAS1	TMEM176B
ADD3	CNIH2
PEG10	SHC3
HSPH1	RIMKLA
PITPNC1	WHRN
RRAS2	SNORA2A
PDZRN3	NTM
MICA	RNF144A
CACNA1D	B4GALT6
LMO4	ZNF275
MMP24	PHF21B
MICAL1	DNAJC10
ATP6V1B2	KIAA0319
HIST1H2BC	PCLO
PRKAR2B	ACAP3
BCAM	FN3K
TNFRSF11B	ADRB1
EMP1	SMOC2
MRPS31	CTXN1
ERBB2	SPRED2
MYOM2	MTSS2
DLG4	PTP4A3
CELSR3	PGBD5
SYN1	MEIS3
VEGFA	FOXA2
TXNL1	PRTFDC1
LPCAT1	FOXP4
TGFBR2	NBEA
CHPF2	P4HA2
NTF3	SCRN1
PIPOX	HIP1R
IQCA1	TSPYL4
RNASE4	PARD6A
BLVRB	CCDC34
MYO10	CBLC
PAPSS2	SCARNA17
ACLY	IL17RB
TIMELESS	MIR1289-2
PPP1R13B	ACSL6
CLEC2B	NFASC
LOC441204	CENPK
MYT1	CEACAM7
IER2	PITPNC1
TRIP6	MLLT11
PLXNB3	REC8
EGR4	CUL4B
FHL1	ETV5
HBB	MSI2
TLR3	ROGDI
TIAM1	C1QL3
BARD1	BRSK1
PRUNE2	PLS1
CA4	GPR19
AKR7A3	RPL23AP82
LTF	RPS6KA3
DKFZP564C152	KCNMB4
MTSS1	ELAVL4
PAK3	TBC1D8
PLOD2	PIGZ
KCNK1	TSPAN13
SPTBN4	CBR1
ACADM	CCDC183
PIP5K1B	TSPYL2
CLDN3	MIR429
SLC7A11	MAST1
DOCK3	MOAP1
QPRT	STAG3
LRP1B	SARDH
HPGD	PTGER1
SEZ6L	SLC6A1
EFHC2	NYAP1
PIGT	LHFPL4
ARHGEF10L	CA11
TUBB2A	SKAP1
WNT4	DNAJB5
CHRNB3	FBLN7
TNFRSF25	RHOBTB3
PLD3	CCDC153
RGS7	KRTAP5-AS1
RGS11	C2orf15
PRPS2	FAM86B3P
CITED2	SYCE1L
GRIA3	SNORD114-29
LAMC1	TTLL10
RCN1	TIAM1
EEF1A2	SNORD96B
FAM184A	PHKA1
KLC2	AMN1
GPC4	TNFRSF19
HK2	CBFA2T2
OCLN	KIAA1211L
SLC43A3	ZMYND8
CAP2	KLHL35
MGAT4C	ETV4
NOMO3	DNAJC6
ELMO2	C2orf27A
SCG3	XKR7
LAMB1	STK32A
HPCAL1	FGF1
PLEK2	USP32P1
AGR2	SCARNA21
FRRS1L	SCG5
FZD2	KCNC4
CREB3L1	MS4A13
SLC39A14	N4BP3
TTR	PLCB1
F2RL1	KLC2
DCN	MIR578
TMEM53	FBXO16
NDN	HS6ST1
CBR1	ICA1
SLC16A2	B3GAT3
FXYD3	RIMS2
SDCBP	ENAM
KCND2	PRKAR1B
SLC16A4	CANT1
COBL	C20orf144
FERMT2	RASD2
CST6	CEP126
SLC16A5	JAG2
FOSL2	HYLS1
MT1E	SLC35G2
SEMA3D	CADPS2
ARL4C	LRCH1
STARD13	DLEU2L
ABCC1	COL1A1
SQLE	CACNA2D3
PPFIBP2	ARHGAP32
MEF2C	PDE4DIP
KHDRBS3	RFPL1S
SLC5A3	RUFY3
SPINT1	FBXL16
TEK	SLC2A11
ADCYAP1	STK39
EFEMP2	TMEM241
MAPK13	TMED8
HBA2	SLC38A8
PAM	CAMK1D
ELK3	C11orf80
MT2A	SEL1L3
ID2	RIMBP2
NSF	DDX25
NOMO2	MIR1207
BAIAP2	DNM1
FAM110B	MIR1206
ID3	UCHL1
PMP22	IL17RE
HBA1	ZNF92
SPTB	TRIB2
SDPR	LRRC18
ALDOC	CAMK2B
GRIN2C	MREG
SLC35D2	TNFSF4
NDRG4	NET1
CCL14	SIMC1
ADGRG2	AOPEP
TBC1D1	ZFHX2
QSOX1	CDC34
UNC13B	CDC25B
NPAS2	LRRC73
RAB31	CMAS
GPT	RFC3
DPYSL4	PGAP1
ISL1	PFN2
BRINP1	FAM174A
EPB41L4B	ICA1L
ANXA3	DGKG
LYVE1	PAM
STRA6	SNORA15
GPD1L	DMXL2
FST	INPP5F
SGK1	AP1S1
PSMB8	SPRY4
CELSR1	PAFAH1B3
HLA-DMA	XYLT1
KCNMB2	KIAA0895L
LPAR6	SYNJ2
CPM	AMMECR1
LBH	LSS
PCDH8	GNA12
EMC1	CDKN2B
SEBOX	C4orf48
EPS8L1	COL1A2
TSPAN5	APBA1
RBPMS	ABHD2
HPSE2	CSTF1
FBXW7	PDXP
WBP1L	ITGB8
GNAI1	TMX4
HLA-E	ABAT
BAALC	ABR
FAS	SLC39A4
ACTL6B	ADCY5
NEMP1	DNMT3A
LAPTM4B	CIPC
KCNK7	PPP2R3B
SYNE1	HCN3
ABAT	PFDN4
SEPTIN6	KCNH3
CYFIP2	SNORA40
SPEG	TIMM29
LOC728392	ABHD18
GGT1	MIR1204
FAM63B	SHB
EMCN	ZKSCAN1
KIZ	MTMR4
CCNB1IP1	SCOC
TPBG	SLC7A3
CAT	CLSTN3
SNTB2	FKBP2
COL1A2	ZNF202
TES	CPSF6
FGF12	ITPK1
PGAP1	RAB3IP
UBE2S	SNORA21
DYNC1I1	LAPTM4B
RAB3A	C6orf226
GGA2	RINL
SV2A	TPD52
TMEM158	APOL2
CDC42EP2	DUSP6
ERBB3	NAV1
SRGN	PLPP5
SRGAP3	PRKAB2
SEPP1	LCORL
KBTBD11	SDHAF4
PDE4A	STXBP5
CDS1	AP1G2
CNN2	LRRN2
OMD	SQLE
RRAD	SSR4
ENPP2	MAD2L1
HTN3	CREB3L1
KLF5	KIF21A
MPP2	KRT18
SMAD3	NOMO3
IFT88	ELMO2
PRPSAP1	TUBA1A
KIAA0087	CUTA
ST8SIA3	ATP6AP1
PRNP	TEAD1
SCAMP5	SNORA77
GDI1	TIMELESS
NECAP1	NOMO1
SYNRG	KIFC2
CDC25B	OR7E24
TPD52L1	DNAJC30
PODXL2	GRAP2
ATP6AP1	MANSC1
CEBPA	PCMTD2
CCDC170	LPIN1
TRMT13	PPP2R1B
JAKMIP2	EXOC7
NAAA	NDRG3
IRX5	GNAI1
STMN2	BFAR
DGKI	MPHOSPH6
CYBRD1	TMOD2
PRR36	RFX3
NUDT2	VAMP2
COPG2IT1	LINC01000
RYK	CCNF
TCF4	PLP2
RPRM	NME1
TSPAN8	CLN8
PPP2R2B	SESN3
SMO	PPIP5K1
RAB6B	KCTD13
LRP4	SNORA38B
FAM111A	MAGED1
KANSL1L	POP7
CTAG2	SNURF
DTX4	SELENOH
CYP3A7-CYP3A51P	GAREM1
MAGEL2	SRP54
BHMT2	DOP1A
INPP4A	RPAP1
C3orf14	RMND5A
CKMT1A	MIR379
PGF	MRPL42
FAM35A	DBNDD1
FNBP1L	BDNF-AS
ANKH	MGAT1
PARD6A	TOB2
OSBPL1A	MADCAM1
CRYAB	CEBPB
ITGB3	SH2B3
IGF1	MIR450A1
FLRT2	PIK3AP1
TNFAIP3	COL16A1
SNX10	WWC3
MITF	MIR1286
AGFG2	CFD
PCSK1N	AKT2
NAT1	GZF1
CENPN	SNTB2
NAP1L3	PRKD3
HCG4	MLLT3
HSD17B3	AQP5
GADD45G	LRGUK
DHPS	S100A14
PSD3	PIK3CB
SORBS2	ACVRL1
SORL1	TM4SF20
ADAMTS5	CADM3
PHYH	LAP3
GGT2	WDTC1
CACNA2D3	ARHGAP31
OLFML2A	RILPL1
ITM2C	ADAMTSL5
SULT1C2	C6orf223
TRIM5	WDR38
HLA-DRA	MIR138-1
DGKZ	MLC1
RGN	ZEB2
PLSCR4	PLEK2
MYRIP	LRRC8A
NEDD9	FNBP1
MAL	FCGR1B
SOD3	LRG1
TMBIM1	CALR
SCD	RGL4
ZNF124	IL4I1
LDLR	HOMER3
RAB40C	IFITM3
NR4A2	PCCA
ABCC4	C8orf31
PTGER3	HSPA12A
PTP4A3	GIMAP6
YAP1	DNMBP-AS1
DCLK1	NFKBID
HSPB11	ART3
TSKU	GLTP
GTDC1	CASQ2
COL1A1	TCERG1L
SH3BP5	MITF
PPARD	GJA4
JAM2	WFDC2
MTOR	LONRF1
TULP4	FBLN1
SLITRK5	GATA5
GAREM1	GPRC5C
HMP19	HAND2
DYRK3	IER2
KCNMB4	NMI
ITGB7	ROBO3
SH3BGR	GBGT1
PPT2	HSPA7
MMP24-AS1	C8G
ENSA	ZBED3
PIGC	TPCN2
MFAP4	PIWIL2
ENO2	CCDC69
MAOA	DYRK3
PLA2R1	ZNF558
CERS6	CRHBP
HOXC4	VAMP5
TESC	SLC22A15
MADD	SLC15A2
CFD	TRIM10
FAM131A	SBSN
NID2	SERBP1
CREG1	ALDH1L2
EMID1	GTDC1
NXT2	RRAS
CACNB1	C2orf88
ENTPD4	BZW2
ACP5	ATL2
EPHA3	RDH12
SYT11	TSKU
TEAD4	PLEKHN1
CEACAM5	TEK
ADIRF	SLC24A3
BACH2	MAD2L2
MAST3	EPO
PPP3CB	TGIF2
SSR4	SAMD15
STOM	GPR146
TMEM159	CYP19A1
WNT5A	CCN2
HCAR3	NINJ1
FAM153B	MEF2C
MAPK8IP1	EHD2
PDGFRL	ARHGEF6
APBB1	SYDE1
ARHGEF40	CRYZ
EDEM2	PDGFC
FUT8	OR4K15
CROT	ICAM5
SUCLG2	CIRBP-AS1
USP1	GALNT15
ST3GAL1	ZNF677
SIPA1L3	ETHE1
GJB4	PZP
RSPH14	MYH7B
BEX1	POLE4
PRKAB1	PLEKHA4
SNTB1	SLC22A11
CALM1	PEF1
DAPK1	TTC23
TSPYL2	GIPC2
LMO2	FABP5
ELOVL1	CPXM1
HOPX	CLEC14A
C14orf159	CDCA7L
SHROOM2	EMX2OS
KCTD12	LHCGR
GSTK1	PIN1P1
RELN	ATP8B4
ID1	LRRK1
PART1	TNFRSF1A
PPFIBP1	FAM110D
ABCC5	ARMH4
ASNS	CHRNA7
RCBTB1	ACKR1
DUSP8	CTSL
CLASP2	FHIT
CKB	TDRD10
AMPD3	C1S
CELF2	FAM170A
SHC1	TNFSF10
IPCEF1	LY6G6D
LDB3	FLI1
NDRG2	MARCHF2
TUSC3	PSMB8
HCN2	PPP1R3C
TP53I3	FZD7
RAB29	UNC5C
DBNDD1	FABP3
NUP210	SLC16A4
CACNA1G	DUSP14
PLBD1	GADD45B
MMD	FMR1-AS1
RCBTB2	PI3
MORN1	LITAF
ECM1	KCNJ1
ABI3BP	SLC8B1
TNR	PGM2
HOXA10	ADGRG3
DAZAP2	LGI3
OCA2	ZNF311
CEBPB	BDH2
NBAS	VPS37B
ERLIN2	PIEZO1
ANKRD34C	APBB1IP
IGFBP7	SLC25A3P1
CDK1	TMEM159
RGS10	IPCEF1
HEG1	LAYN
GOLGA8N	CAPNS2
LITAF	CCDC171
MMP16	CCHCR1
ACACA	TCIRG1
NRIP3	RBPMS2
GNAL	PYGO1
CLDN4	PMP22
KIF3C	MMP8
ASPHD1	PLP1
CAMK2N1	TECRL
CDK2AP1	MYOC
SMARCA4	MESD
LEPROT	ADAMTSL4
ALDH9A1	CXCL14
RBM38	QKI
CRABP2	KCTD15
FABP5	FBN1
CCND3	NFIX
FKBP1B	DDR2
GOLGA8A	AOC3
SRPK2	EFEMP1
NEURL1	UBXN11
MMP2	SLC20A2
VANGL1	ODF3B
RUFY3	PRAG1
DPYSL2	MYOF
PON1	NEK6
GRSF1	ZFYVE1
NT5E	EMP3
CHGB	SVEP1
NELL2	MEIS3P1
SNX2	MC5R
WASF3	MFNG
PRUNE1	EGR2
DDC	NIBAN1
DACT1	ABCC4
FAM46A	C12orf49
LIN7B	CFI
LY6H	OCLN
CAMSAP1	FSTL3
ASS1	CCDC178
REST	ZBTB2
CNTNAP2	PHKG1
NPC2	CAV1
SMA4	TFE3
GIMAP6	BLID
NEDD4L	ARHGAP18
IL4R	SLC26A8
KIF5C	NADK2
BMP5	KCTD12
NR3C2	RARB
TFPI	SCN11A
RNF114	MXRA5
RDX	GIMAP1
SUSD4	RNASE1
CPA4	MT1A
ICA1	CHIT1
GNLY	KLK3
ST8SIA1	CD300E
PRSS16	GRIN3A
JMJD6	PRR29
GNG4	KLK15
PRC1	PKD1L2
ZEB1	RAG1
ICAM2	FUT8
TACC3	TNMD
UCHL3	SCN5A
WWC2	CDC42EP1
SSBP2	EBF3
GTF2H1	CDKL1
FMOD	PDE4A
PCDHB13	ECE2
HIPK2	GAS7
NCOA3	ITGAM
ZNF12	TPMT
TOB2	TNIP1
RARB	TRIB1
TERF2IP	FGFR3
MARCKSL1	RARRES2
FAM53B	LIMS2
LRBA	CASP7
H3F3A	CD44
FARP1	SLFN12
ZNF274	SULF2
CRIP2	CGAS
PTMS	LIPI
ST6GALNAC4	ARRDC3
OPTN	EBF4
LGALS3BP	IGFBPL1
TACSTD2	FMO4
DDIT3	FFAR3
CNN3	GPC3
COL4A4	BNC2
HTN1	CLEC2B
PROM1	RBMS2
CHRNA7	AGTR1
PLIN3	CHI3L1
ELOVL4	LYPD5
SERGEF	NMRK2
DSG2	EPB41L2
GOLGA8G	RHOF
ARHGAP8	SFTPC
MEIS2	DNM1P46
PIGZ	LIMK2
DOCK1	NPL
ARHGAP32	SFT2D1
SCARF1	ATP8A1
FMO1	USP54
COTL1	GCSH
DYRK1A	CEBPA
SYT17	EFNB1
FDX1	PRG2
MYO5C	OXT
LIMA1	PLEKHH1
SLC7A8	LILRA5
IGF2	PLIN3
TIMP1	PGM5P2
ASB13	NR3C2
SNCA	RIOX2
FBXO34	IGF1
NECTIN2	ECSCR
N4BP2L2	DACT1
HN1L	CYP39A1
JUNB	CLIP1
DPYD	ROBO4
PPFIA3	PDZRN4
THSD7A	PHEX
SF3B3	LTBP2
KPNA2	SPEF1
PDLIM5	KLK1
PTGER4	ADORA1
CD24	CXCR3
WDR19	TSGA10IP
SERBP1	ZCCHC24
PHKA1	CCL16
GDPD5	C22orf23
DAB2	CCL7
MEIS1	CCDC13
SHC3	WSCD2
ITSN1	AGR3
MAP3K8	RNF217
GNB1	COL8A2
FCGBP	NUPR1
UPF3A	CHI3L2
ISLR	SYPL2
ITGA2B	C11orf74
GTF2B	SOX18
ZNF148	CHST3
SH3TC1	MIR938
VAMP2	PLEKHS1
CD69	PCAT18
SMYD2	CPTP
CAMK1G	ACSM3
MICAL2	P2RX1
RBPJ	ARHGAP20
PFKFB3	LCN6
SYT5	RBPMS
GTF3C5	GALM
ANXA4	FBLN2
CLIC5	REST
TUBA1A	HSD11B1
EGFR	FMO1
CFI	MPO
MYL6	CMTM7
AGER	ATF7IP2
ASTE1	GIMAP8
SRGAP2	HK2
SCGN	ARHGAP10
AHSA2	TMEM71
ARHGEF5	IDO2
UXS1	SGCA
CDC42BPA	GLIS2
CKAP5	HRC
COL9A3	DPP4
MPP1	RPS6KA2
U2AF1	RNASE4
KCNB1	C11orf88
BAIAP3	HSPA12B
PTK2B	PRRX1
ADGRL3	CDR2
IQSEC3	ZNF385A
PRKCD	TMEFF2
APH1B	PLS3
PPFIA2	EMILIN2
ASCL1	ALKAL2
CPE	PARD6B
PPP3CA	RIMS4
TPST2	GPM6B
SPRY1	ASGR2
PPARG	KIF1C
MID1IP1	SCARF2
TTC13	PTGIS
RBP1	ZC3H12A
PIK3R3	LGR6
H2AFY	CDH5
GCLM	LRRC8C
SLC36A1	ALDH1A1
MAPK10	FAM49A
LRRD1	MPZL2
PDGFRA	CPAMD8
NMB	UBASH3B
VDR	SLC43A3
MARK1	TBC1D2
GNA12	CDC42EP4
MSANTD2	C1R
CDK5	ADGRL2
GNE	PUS10
PTCRA	TEKT1
EPB41L2	FRRS1
RRN3P1	KRT86
STARD5	FAM43B
PPP1R15A	LDHB
DDX24	LGI4
MUC16	LAMC1
CNTN1	GBP1
KLF12	FGL2
REEP2	SDC2
MYL4	CLCF1
HLA-DQB1	GPRIN2
FAM171A1	LGALS9B
C1QL1	TMEM243
TTBK2	SAMD9L
CNDP2	SYNC
PDIA2	L3MBTL3
NBEA	NAPSA
MOAP1	PIGA
MERTK	BACE2
AXL	PPARD
DSCAM	SERHL2
WASF1	NKG7
PTPRC	RTL8B
CTSA	PRSS8
MARS	RHOD
PARP4	LRP8
NACAD	ATOH8
FBXO21	LTBP1
ALDH2	ZNF676
MMRN1	CBS
ZZZ3	ENPP1
CHGA	MIR216A
STMN1	GPC4
RPL18	YBX3
ZMYM6	NID2
KLF6	DOCK1
CYP4B1	GLI3
GFRA2	ALPL
MLF1	BTC
TMEM127	LRRC15
PCDHB11	GPRC5B
EXTL1	RPL29
STXBP3	FOXR1
CYBA	TNFAIP8L3
GLT8D2	ZC4H2
PXDC1	MYL4
SYP	SERTAD1
TMEM87A	SVIL
ABCA8	ANPEP
LRP12	KLHL4
CACNB3	NFIB
AQP3	PPIC
NRP1	FXYD1
CALCRL	DOK5
NUP93	CARNS1
GALNT14	TBC1D4
HBP1	SERPINB2
CDR2	SLC16A2
HACD1	LATS2
NMI	KCNK4
NOL12	JOSD2
HMCES	CCDC80
PNMA2	SLC27A6
C2CD2L	EPB41L1
PKD1	ESAM
ACTR1A	RAB31
ERP29	CCL13
SPHAR	EHD4
PIP4K2C	CYP4B1
SVEP1	GGTLC1
SNN	CLIC2
HECW1	XPNPEP2
TSPAN7	MAST4
TRAPPC9	EFCAB13
ESPL1	KCNK2
LRPAP1	IGSF10
C3	PTPN21
GPX2	OAF
ALPP	RGS8
PSMD13	SALL4
PTPRM	HERC5
MAT2B	GNLY
TSPAN13	SIRPA
PAX9	SERPINA5
SLCO5A1	EGFR
PLA2G4B	GULP1
ESD	OR2T8
NUDT9	SLC23A3
RMDN1	PYGL
AGL	MIR30C2
MISP	PDPN
LRP5L	OSBPL3
SNX7	TRIP6
PIBF1	GOLGA8IP
SPARCL1	FHL1
PRDX4	ASAP3
COL2A1	TEAD4
CALB2	PPARG
NRG2	ACSS1
TSPO	SLFN11
SRPX	KRT27
PPIP5K1	PTGDS
ZFYVE16	SLC39A14
MCFD2	SYNE1
TCF7L1	TSPAN6
CADM3	CYP2S1
GMDS	BMP4
HADH	LAMC3
TRPC4	INPP5J
PPP2R3A	SNCA
ABCA3	TRIM5
KIAA0368	FOLR2
TRIO	PRTN3
ATF7IP2	RAB23
CEACAM7	SYTL3
PADI3	SLC6A9
DPT	KLHL40
STK26	MOXD1
STX7	WWC2-AS2
TPP1	ANG
ADGRL1	SLC12A8
SMAD9	ABCA9
CXorf57	SLC38A5
ALDH6A1	C15orf48
C9orf3	PCP2
ASB1	GBP3
NADK	MORN1
AGTR1	TEAD2
SHANK2	DAPK2
VCL	BTBD17
S100A8	TMPRSS2
AMT	ABCA6
HDDC2	HAMP
SMC1A	SCX
DDX18	TMEM144
TRIM22	SNTB1
CA8	FBXO6
REC8	ITM2A
RARRES3	SLC19A3
LYPD1	PLBD1
ARHGAP29	FNDC1
HAL	KIF7
MTCL1	BCL2L12
FERMT1	VEGFC
RXRA	PMP2
CDKN2D	ITPR1
RIPK4	PBX4
NCK2	IL33
TFAP2C	CDC14B
ARHGAP10	FES
PPEF1	ALDH1A2
SMR3B	WDR78
CELSR2	KIF12
PNMAL1	ID1
CD27	NOTCH2
TMEM8B	PLEKHO2
AHR	PREX2
USP27X	SPTA1
PDE8B	AQP7
CTAG1A	PAPLN
C11orf49	SYTL4
EFNA5	GRIK4
HIPK1	SLC47A1
PCDHB12	MALL
C10orf10	NDP
CEACAM1	ZNF114
PTGS1	LRRC7
ROBO3	CASC2
RIN2	ZDHHC19
SLC2A6	ALDH1B1
SCG5	MAFB
GM2A	SMPDL3A
CA11	PLEKHF1
CLASP1	RILPL2
PPP6R1	HHIPL2
BTG2	EPB41L4A
DMPK	PGM5
IRF8	SLC2A10
SV2B	MT1E
LMO3	ULBP3
FAM13A	EFS
TRBC1	ANXA1
GIMAP5	VIT
HIST1H2AI	ATP4A
EFNB2	PLPP3
MARCHF3	CYS1
ZBTB18	SLAMF8
RARA	GSTM5
ANKLE2	SGCD
RAP1GAP	CCDC170
MAST2	TSHZ3
SLC24A1	PSMB9
PTPRB	ZNF385D
CCNA1	HOPX
RAB26	SMAD3
CA14	MAP1LC3C
LDB2	NPNT
PTPRS	MIR99B
FLRT3	GBA3
FIG4	COPZ2
PARP16	GXYLT2
B3GALT4	ST3GAL1
TPMT	HBG2
TJP2	HAS3
IDUA	YAP1
CYP3A43	STON2
ADCY2	RGS16
RCL1	CRYGN
CYP46A1	TKTL1
KRT7	ESPNL
TP53BP1	NT5E
TBCB	ASPG
S100A10	PCOLCE2
SLCO4A1	SNX22
HTATIP2	SPTLC3
LRRC14	LPCAT2
IQSEC1	DPT
TUBB3	CLU
NEDD4	GLT8D2
RASA4	FAM3D
RASSF9	RADIL
CRHBP	SLC47A2
P3H3	SCD5
TOX3	SBSPON
ASAP2	EPHA6
SETX	SEMA4A
THBD	RXRA
KLF3-AS1	CX3CL1
GATAD1	GATM
GRB14	ORM2
TSSK2	CCDC85A
RPL31	RAB38
MGAT1	SGMS2
SLC48A1	CAV2
CDH2	PRODH
ASGR1	KATNAL2
SCGB1D2	FLRT2
TRIOBP	DHRS3
IRGQ	LYVE1
FAM20B	ERBB2
ID2B	FCN2
LOC389906	FOXO1
TBC1D9	SOD3
RAP1B	FCGBP
KCTD15	FAM110B
MLPH	CFAP69
BAZ1A	PRSS16
SCAMP1	FZD8
GAPDHS	JAM2
PECAM1	TRIM31
LIMK2	RYR1
TLE3	ALPK1
PLN	PAPSS2
C1orf116	SLC17A7
THUMPD1	PWWP3B
PPP2R1B	LAMA1
OS9	C8orf48
LGALS3	CHRDL1
CADPS2	CDC42EP2
WDYHV1	GZMH
FBLN1	TBC1D10C
LSM14A	GSDME
NR2F2	ST6GALNAC3
NGLY1	SEMA6A
CST2	RNF144B
GAD1	ALS2CL
CLSTN3	THBD
ZMIZ1	HACD1
TSPYL4	ESYT3
RGS12	LVRN
SLC35G2	BHMT2
LAMA3	HSPB3
EHD1	BCO1
ELL3	LILRA3
DAPK2	CA1
BCL10	TMEM233
LYZ	SLC30A2
NOL3	FABP4
GPER1	TIMP4
PTPRH	NR6A1
SYNCRIP	GAS1
MYO1D	FCRLB
SIK1	FBN2
UCK2	AOX1
ANO1	CACNG6
MYBBP1A	RSPO3
NFKB1	MRO
MFSD11	MMP2
SLC25A14	RSPH6A
BARX2	MCOLN3
FAHD2A	MAB21L2
IL32	RAB7B
HRK	SLC34A2
RPL37A	PABPC4L
CDH22	CLDN1
MAGED2	NEB
SIX2	RARRES1
FBLN2	UNC93B1
BCKDHB	COL9A3
ZNF330	METTL7B
TNFAIP8	SLC1A1
AKAP8L	SERINC2
MFSD2B	NGEF
ESYT1	TCF7L1
HIST1H2BJ	ACTC1
PBX3	CP
CX3CR1	CDO1
KCNK12	EDARADD
PRSS12	RBP7
IP6K2	ADM2
DDX25	BNIPL
THEG	RAPGEF3
LYN	CD27
CHD5	DEPTOR
ALDH1A3	CSDC2
KCTD13	HBB
OXCT2	KIT
SMCO4	TIFA
COL9A2	AIF1L
SLC30A1	TBX22
RUNX1	PYGM
AFF1	ALKAL1
PON2	DOCK8-AS1
RPL36A	CYP26B1
ISG20	PLA2G7
AMMECR1	ANKRD13A
GPRC5B	ISM1
PAIP2B	ACKR3
TCFL5	CAP2
CECR1	MFSD6L
FNBP1	SOX10
MAGED1	CACHD1
DOK5	SMAD6
PNMA1	CD300C
SGMS1	AFAP1L2
DLK1	KCNJ5
LSAMP	CPNE8
MAPK8IP2	ARHGAP28
ITGB1	PDE11A
GNAO1	IRS1
YWHAZ	DUOX2
MAP3K13	SCN4A
PTGDR2	PTX3
PLAGL1	KCTD8
SNAPC2	TUB
SLX1A	CAVIN2
GHRHR	ASIP
CXCL12	CLDN8
PIP4K2A	TNFRSF11B
CHMP1B	RNF165
HERC2	GNAL
CALCB	C6
DOLK	CRYAB
LTBP4	WNT11
GADD45A	IL15
ASF1B	DIO2
PTRF	MMRN1
CHRNA1	IL18RAP
OAZ2	SHMT1
PSD	CIDEC
MKL1	PGF
AOC1	THRSP
SERHL2	MPPED2
DHX30	FOLR3
TPM1	LARP6
AKAP7	EFNA4
BUB1	P2RY2
FOLR3	GFRA2
PACSIN3	IL1RN
FZD7	SRPX
SSFA2	PRRG1
RAB40B	LY75
RGP1	MT1M
MAPKAPK3	MARC1
PACRG	ADH1B
EPB41L4A-AS2	ANXA3
PTER	NXNL1
PLIN2	ANK3
CD8A	SLITRK2
NUP188	MMP3
TRAC	MARC2
ZAK	UNC13C
PAWR	KCNJ13
LTC4S	TLR3
PHOX2B	S100A8
CHD3	C3orf52
PTGS2	BMP7
DAZ4	ANGPTL1
ZNF710	DLX3
MEAF6	ST6GALNAC2
TNNC1	SPX
INPP1	ADGRF1
ITGA10	F13A1
TPK1	ODAM
AEN	PLCH1
CSPG5	RASSF9
CASC1	TRIM17
MLEC	CYP27B1
PRKD3	ANO5
NCS1	SLC14A1
ERG	C1orf115
PPME1	FAM181B
TPD52	TRIM6
GFRA4	TNNC1
HRAS	PROSER2
CTDP1	GRB14
EZR	OCA2
TARP	RTN4RL2
GIMAP4	EPHB6
PIK3CB	SMIM10L2A
PAN2	NKX6-1
EPHB1	HCG4
UBE2D4	MIR567
ZNF93	GLDC
NECAP2	ARAP2
TMEM132A	MYBPH
KIF1B	DNAAF1
BCL2L10	RASGEF1C
CDCA3	GRIN2C
C11orf80	KRTDAP
CASP6	IGDCC4
ATP6V0B	COL9A2
ZNF430	TMEM37
SOCS1	HSD17B3
SHMT1	PRKX
C14orf79	CCL8
ENOSF1	DDIT4L
IGF2BP2	CLEC10A
CMAS	ORM1
EXT1	NFE2
CREB1	IP6K3
SNPH	FAM189A2
SCPEP1	MAPK4
VDAC3	RASAL1
TMPRSS5	FLRT3
KIAA1551	CYP4F11
FMR1	IGDCC3
ICMT	MLXIPL
PRKD1	DGKI
PEX11A	LTF
ZDHHC11	PGA5
RPLP2	TRMT9B
PAH	PADI4
PRMT8	ITGB3
CACNA1B	MUC16
NSG1	RAG2
AHI1	KCNQ1
PLEKHF1	CCL23
ANKS1B	PACSIN3
PPP2R5B	TACSTD2
PTN	TMEM171
CCDC181	IL24
FAM45A	TRPV6
DPY19L2P2	PI16
MTHFD2	COL4A3
GLS	GPR83
NPHS2	LRAT
HEY1	ACSF2
NDUFA4	ACADL
TGIF2	KCNAB1
SHCBP1L	TIAM2
TSHZ2	GPRC5A
FJX1	ARHGAP6
ZCCHC11	FOXP2
OSBPL9	TFAP2C
PIAS3	RS1
CYP2B7P	NPR3
NAV2	SH3RF2
GALNT4	TRPM3
KCNC4	FAM107A
NECTIN1	RANBP3L
ACKR1	APOA1
TFAM	SCARA3
RRAS	CAMP
DPY19L1	SEMA3D
LYPLA1	FAM124A
ITSN2	DNAAF3
NRSN2	IQGAP2
VGLL4	RELN
ADH1B	MIOX
STMN3	CORO6
PTP4A2	KLK2
CAST	COL4A4
CKAP2	ABI3BP
PPP1R9A	HS6ST3
ICAM3	PRKCQ
PBXIP1	AHSP
USP46	GLIS3
GDF10	PLA2R1
SAFB2	LINC00092
TNFRSF10C	RCAN1
P2RY2	DMRT3
CHST2	FGFR2
HTT	SCARA5
ABHD8	IQCA1
EIF5A	CYP24A1
CHPF	PKNOX2
FMO4	MUC15
PVR	COL17A1
SMARCA2	BBOX1
TNPO1	KCNJ15
KLHL41	PKHD1L1
TOP3A	TRIM58
YME1L1	IYD
MNT	CFAP46
RALYL	LIX1
VWA5A	CLDN23
KLHL24	RRAD
SERPINE2	CLIC3
PRRC2B	FGFRL1
EVI5	ECRG4
CIDEA	ZBED2
LSM14B	LRP1B
COPG1	PRDM16
PHACTR1	HKDC1
SOX10	TDRD9
TMED5	MIR614
PFKM	ATP13A4
ARHGAP25	CUX2
PARP1	FREM2
GPR153	PRTG
ADAM15	LCN2
SYNM	PAX8
KAZN	CTSE
APBB2	MT1F
GPM6B	LRRC2
MST1	GALNT9
BCAP29	ARL4D
CGA	FOXQ1
ITGA7	SORD
GLUL	MT1G
LRMP	SELENOV
ASRGL1	S100A1
PARP8	HGD
MALL	TMEM139
ARF3	KLK4
CDC27	MGST1
SENP5	GAL3ST3
PPP1R2	SLC26A7
NFYA	SLC4A4
BACE2	ZNF804B
CYP11B2	DUOXA1
SIK2	TPO
IVD	PPP1R14C
AMACR	LIPG
NARF	ALAS2
SUB1	CYP1A2
SULF1	DUOX1
CFHR1	WDR72
BAG2	MT1H
GORASP2	CDH16
ING1	TSHR
NR2F1	SLC26A4
GSTP1	FOXE1
FUT6	FAM181A
MSMO1	FOLR1
BUB3	TG
IL27RA	KCNJ16
RAPGEF3
KMT5B
FN1
SDC1
EBAG9
FADS1
DENND2D
ZNF75D
SRF
SP140L
NUP50
PHF8
PSG6
SPRED2
DKK3
DMC1
ZC2HC1C
CTSO
TRIP10
BMP8A
HLF
SWAP70
ZNF14
GDAP1L1
GSTM4
CAPN2
GTF2H2
PDPN
C3orf52
GLYAT
FAM163A
ATP1A3
PLCL1
NPTX2
LAMA2
SEMA6B
SEP15
UGGT1
FPGT
MAP1A
SLC7A4
RAP1A
SPTBN2
DCTD
KPNA1
RBM47
TSPOAP1
SMURF2
CLIP3
DYNC1H1
AK2
SDC3
TNIK
TFF3
NCAM1
MYO15A
CNNM2
OR7E37P
MRPL40
EIF1
TLE4
MVP
ARHGEF4
PSMB9
TACC2
ETV4
NUP205
MED27
TMEM2
SH3GLB1
RGCC
EIF2S1
RTN2
SDK2
RASGRF1
NXN
KIFAP3
AKAP12
PFKFB2
KPNA3
LOC157562
FAM129A
ZMYND8
TMCC2
ASAP3
VCX2
PLPPR2
CYP3A4
APMAP
NCOA1
RAPGEF4
BCAS2
ABHD4
ECHDC2
CDK9
LANCL1
FLRT1
CLK4
FSCN1
EDNRA
FKBP11
PIK3R2
LONRF1
MCM3AP-AS1
ABCB9
ACSM5
SOBP
LOC644450
TTC3P1
PMF1
NTM
AASS
BORCS8
DAAM2
MIR1244-3
CCL2
FADS2
HP1BP3
KIAA1462
VPS13D
MZT2A
LDLRAD4
PDCD4-AS1
PTGES
ADH6
EPB41L4A
RAB4B
CIDEB
ACTR3B
NR2C2
YY1
TENM4
PIK3R1
MANSC1
HN1
TSPAN4
ITFG1
ST14
NFIL3
MGC12488
TLL2
PLGLB1
HBG2
STMN4
BDH2
SLCO3A1
GRAMD1B
SDHD
FBLN5
HSPA12A
COL3A1
SELENBP1
SLC27A2
IL11RA
SLC6A6
NR4A3
TGDS
CCNG1
DHCR7
GUCA2B
GFOD2
BAG1
SHC2
TMEM50B
N4BP3
RPS11
ADIPOR1
EPS8
VPS37B
ARHGEF2
EFNA1
CHMP7
IFI6
TRIM15
ABCC6
MYO15B
TRDMT1
ATP8B2
KDM1A
CD200
FLT4
IL7R
TINAGL1
GP6
MYO1B
RNF4
IL17RB
HLA-DPA2
GSE1
ELOVL6
NENF
B3GAT3
MCOLN1
BSG
CRYBB2P1
ALDH7A1
FARSA
HBE1
STEAP3
NPL
TTC39A
ZCCHC24
RREB1
MCM3AP
TOM1L1
DDB2
STRN4
DCTN2
LRRC15
PPP2R3B
SAPCD1
SLC25A12
PTP4A1
ISYNA1
AKR7A2
GGTLC1
PLXNA2
PEG3
GNAI3
BCOR
IFT52
TBX1
RNF170
PDE10A
PCNX2
MAP2
FBXO7
RABL2A
GCFC2
SPAG5
MFSD12
BTD
SF3A1
TRIL
SPINT2
SLC25A22
BATF
EMP3
CALM3
HNRNPAB
PCSK1
TRAPPC6A
YIPF2
GMNN
SLC22A14
HLA-DPA1
IFT57
MAPK14
DEK
FZD4
ZNF432
GRIP1
DENND1B
FEZ2
OVOL2
MT1M
GNA11
PLEKHA6
AP1S1
ARGLU1
SNX4
PILRB
ARHGAP44
FMO2
ARCN1
PSMD2
DHRS2
SRSF11
CXXC4
ERP44
IGKC
ACSL6
PSG9
MX1
TUBB6
CTAGE8
PIK3CG
AATK
MUC1
ZDHHC6
ITIH5
HIST1H2BK
CFAP70
BCAS4
S1PR1
FBXL4
VAMP1
MEP1A
PCCA
RASGRP3
TSPYL5
PDIA4
UNG
NR6A1
RPL38
KIAA0513
TGFB2
MAPT
LAPTM5
RIPPLY3
CDC14A
COL15A1
CACNA1C
APBA2
PCNT
FGF18
COLEC12
LAIR2
SIAH1
FSTL1
RORC
GOLM1
HMGB1
SSUH2
MTF2
MED16
UFM1
CHRNB1
SGCB
AKIRIN1
SYPL1
CSRNP2
SMAD7
ADH5
OR7A5
RIDA
S100A11
FOXA2
SUPT20H
SLC25A37
LOC81691
SAE1
[truncated: 15 more rows]

## Sheet: 3b.KEGG pathways 
Supplementary Table 3b: Significant KEGG pathways of human transcriptomic datasets associated with MTC (disease vs normal) (Adj P-value<0.05)
GSE27155			GSE196264
Term	P-value	Adjusted P-value	Term	P-value	Adjusted P-value
MAPK signaling pathway	1.65e-12	5.14e-10	Dopaminergic synapse	2.96e-05	0.00311051
Pathways in cancer	1.84e-11	2.86e-09	Circadian entrainment	3.96e-05	0.00311051
Focal adhesion	3.31e-11	3.43e-09	Adrenergic signaling in cardiomyocytes	4.14e-05	0.00311051
PI3K-Akt signaling pathway	1.27e-10	9.84e-09	Calcium signaling pathway	4.15e-05	0.00311051
Axon guidance	9e-10	5.6e-08	Dilated cardiomyopathy	0.000106	0.00577642
Dopaminergic synapse	4.97e-09	2.34e-07	Thyroid hormone synthesis	0.000116	0.00577642
Rap1 signaling pathway	5.27e-09	2.34e-07	ECM-receptor interaction	0.000293	0.0125437
Proteoglycans in cancer	6.52e-09	2.54e-07	Hypertrophic cardiomyopathy	0.000391	0.0145112
Human papillomavirus infection	8.01e-09	2.77e-07	Glutamatergic synapse	0.000435	0.0145112
Relaxin signaling pathway	9.08e-09	2.82e-07	Arrhythmogenic right ventricular cardiomyopathy	0.000518	0.0147264
AGE-RAGE signaling pathway in diabetic complications	2.54e-08	7.19e-07	Cocaine addiction	0.00054	0.0147264
ECM-receptor interaction	7.45e-08	1.93e-06	Rap1 signaling pathway	0.000627	0.0156734
Cell adhesion molecules	1.33e-07	3.11e-06	Protein digestion and absorption	0.000785	0.018123
Transcriptional misregulation in cancer	1.4e-07	3.11e-06	cAMP signaling pathway	0.00102	0.021855
Adrenergic signaling in cardiomyocytes	1.92e-07	3.98e-06	Glycine serine and threonine metabolism	0.001302	0.0235734
Cocaine addiction	5.64e-07	1.1e-05	Nicotine addiction	0.001302	0.0235734
cAMP signaling pathway	7.02e-07	1.28e-05	Gastric acid secretion	0.001336	0.0235734
TGF-beta signaling pathway	1.22e-06	2.1e-05	Synaptic vesicle cycle	0.001755	0.0292554
Dilated cardiomyopathy	1.88e-06	3.08e-05
Chemical carcinogenesis	2.38e-06	3.71e-05
Breast cancer	2.85e-06	4.22e-05
Phospholipase D signaling pathway	3.34e-06	4.73e-05
Cellular senescence	4.27e-06	5.71e-05
Arrhythmogenic right ventricular cardiomyopathy	4.41e-06	5.71e-05
Growth hormone synthesis, secretion and action	5.04e-06	6.26e-05
Ras signaling pathway	5.49e-06	6.56e-05
Calcium signaling pathway	6.18e-06	7.12e-05
Prostate cancer	7.74e-06	8.59e-05
Amphetamine addiction	9.34e-06	9.69e-05
Small cell lung cancer	9.35e-06	9.69e-05
Glioma	1.02e-05	0.000102
Estrogen signaling pathway	1.23e-05	0.00012
Th17 cell differentiation	1.61e-05	0.000152
Fluid shear stress and atherosclerosis	1.67e-05	0.000153
AMPK signaling pathway	1.75e-05	0.000155
Glutamatergic synapse	1.84e-05	0.000159
Hypertrophic cardiomyopathy	2.05e-05	0.000168
Thyroid hormone signaling pathway	2.06e-05	0.000168
Type II diabetes mellitus	2.6e-05	0.000207
Gastric cancer	2.76e-05	0.000214
Leukocyte transendothelial migration	5.21e-05	0.000395
Bacterial invasion of epithelial cells	5.41e-05	0.000395
Oxytocin signaling pathway	5.46e-05	0.000395
Regulation of lipolysis in adipocytes	6.83e-05	0.000483
Aldosterone synthesis and secretion	8.66e-05	0.000598
FoxO signaling pathway	9.3e-05	0.000629
Neurotrophin signaling pathway	0.000111	0.000738
Renin secretion	0.000118	0.000753
Thyroid hormone synthesis	0.000119	0.000753
Cholinergic synapse	0.000121	0.000754
Human cytomegalovirus infection	0.000128	0.000782
Osteoclast differentiation	0.000135	0.000809
Chronic myeloid leukemia	0.000143	0.000833
Central carbon metabolism in cancer	0.000145	0.000833
Cushing syndrome	0.000149	0.00084
Amoebiasis	0.000165	0.000901
Chagas disease	0.000165	0.000901
Endocytosis	0.000203	0.00108824
Circadian entrainment	0.000208	0.0010941
Non-small cell lung cancer	0.000213	0.00110166
Platelet activation	0.000225	0.00114858
Insulin secretion	0.000278	0.00139581
Hepatocellular carcinoma	0.000298	0.00147202
GnRH signaling pathway	0.000305	0.00148439
Tight junction	0.000333	0.00159326
Hippo signaling pathway	0.000378	0.00178047
Gap junction	0.000384	0.00178473
Pancreatic cancer	0.000435	0.00199103
GABAergic synapse	0.00045	0.00202708
Regulation of actin cytoskeleton	0.000549	0.00244089
Fc gamma R-mediated phagocytosis	0.000557	0.0024418
Choline metabolism in cancer	0.000643	0.00274074
Inflammatory mediator regulation of TRP channels	0.000643	0.00274074
ErbB signaling pathway	0.000662	0.00278405
Valine, leucine and isoleucine degradation	0.000691	0.00286333
Thyroid cancer	0.000751	0.0030716
Parathyroid hormone synthesis, secretion and action	0.000765	0.00307567
Colorectal cancer	0.000771	0.00307567
Type I diabetes mellitus	0.000821	0.0032332
Histidine metabolism	0.00091	0.00353761
Melanogenesis	0.000973	0.00373616
Arginine and proline metabolism	0.00104966	0.00398101
Longevity regulating pathway	0.00111129	0.00416399
Human T-cell leukemia virus 1 infection	0.00116724	0.00432159
Prolactin signaling pathway	0.00133344	0.00487881
GnRH secretion	0.00142415	0.00508701
C-type lectin receptor signaling pathway	0.00143876	0.00508701
Leishmaniasis	0.00143941	0.00508701
Sphingolipid signaling pathway	0.00162444	0.00567641
Cortisol synthesis and secretion	0.00168206	0.00581246
Kaposi sarcoma-associated herpesvirus infection	0.00170668	0.00583273
VEGF signaling pathway	0.00178814	0.00604471
Melanoma	0.00182556	0.00610482
Epstein-Barr virus infection	0.00192404	0.00636571
Progesterone-mediated oocyte maturation	0.00207975	0.00678543
beta-Alanine metabolism	0.00209454	0.00678543
Long-term depression	0.00212009	0.0067974
Wnt signaling pathway	0.00226377	0.007184
Acute myeloid leukemia	0.0023156	0.00720151
Long-term potentiation	0.0023156	0.00720151
Insulin signaling pathway	0.00240404	0.00733267
Pathogenic Escherichia coli infection	0.00240493	0.00733267
PPAR signaling pathway	0.00246117	0.00743131
Aldosterone-regulated sodium reabsorption	0.0028518	0.00851124
Fatty acid degradation	0.00287357	0.00851124
T cell receptor signaling pathway	0.0033603	0.00985346
Phosphatidylinositol signaling system	0.0033901	0.00985346
TNF signaling pathway	0.00369236	0.0105351
Toxoplasmosis	0.00369236	0.0105351
Biosynthesis of unsaturated fatty acids	0.00400268	0.0113167
Serotonergic synapse	0.00411509	0.0115297
Lysosome	0.00427511	0.0117143
Fructose and mannose metabolism	0.00428323	0.0117143
Signaling pathways regulating pluripotency of stem cells	0.00432709	0.0117143
Th1 and Th2 cell differentiation	0.00433166	0.0117143
Glucagon signaling pathway	0.00470412	0.0125443
Oocyte meiosis	0.00471924	0.0125443
cGMP-PKG signaling pathway	0.00484047	0.0127575
Apelin signaling pathway	0.00497553	0.0130033
Notch signaling pathway	0.00509781	0.0132118
Alzheimer disease	0.00514574	0.0132258
Insulin resistance	0.00524024	0.0133583
Autoimmune thyroid disease	0.0055596	0.0140572
HIF-1 signaling pathway	0.00582564	0.0146111
Mineral absorption	0.00592144	0.0147325
Hepatitis B	0.00606303	0.0149651
Pathways of neurodegeneration	0.00654562	0.016029
Tryptophan metabolism	0.00757972	0.0184164
Apoptosis	0.00782342	0.0188611
Gastric acid secretion	0.00806014	0.0192823
Lipid and atherosclerosis	0.00934633	0.0221886
Alanine, aspartate and glutamate metabolism	0.00957721	0.0225645
Malaria	0.00971266	0.0227116
Autophagy	0.00983805	0.0228331
Prion disease	0.00996227	0.0229501
Adherens junction	0.0103537	0.0236764
Vasopressin-regulated water reabsorption	0.0106284	0.0241273
Rheumatoid arthritis	0.0108739	0.0245056
Endometrial cancer	0.0116363	0.0260351
Diabetic cardiomyopathy	0.0123165	0.0273602
Human immunodeficiency virus 1 infection	0.0130822	0.0286356
Inositol phosphate metabolism	0.0131668	0.0286356
p53 signaling pathway	0.0131668	0.0286356
Vascular smooth muscle contraction	0.0134534	0.0290556
Protein digestion and absorption	0.0140746	0.0301877
Glycosaminoglycan biosynthesis	0.0150068	0.0316255
Glycolysis / Gluconeogenesis	0.0150528	0.0316255
Fatty acid elongation	0.0150994	0.0316255
Viral myocarditis	0.0151518	0.0316255
PD-L1 expression and PD-1 checkpoint pathway in cancer	0.0154064	0.0319425
Pyruvate metabolism	0.0168352	0.0346738
Phagosome	0.0174918	0.0357891
Yersinia infection	0.0185682	0.0377431
Renal cell carcinoma	0.0190156	0.0384017
Hematopoietic cell lineage	0.0196357	0.0393981
Basal cell carcinoma	0.0218586	0.0435771
Drug metabolism	0.0221407	0.0438584
Tyrosine metabolism	0.0242303	0.0476938

## Sheet: 3c. commonality analysis 
Supplementary Table 3c: Commonlity analysis of significant KEGG pathways of human MTC transcriptomic data (Adj P-value<0.05)
MTC_GSE27155 ∩ MTC_GSE196264	Adrenergic signaling in cardiomyocytes
(15 pathway)	Arrhythmogenic right ventricular cardiomyopathy
	Calcium signaling pathway
	Circadian entrainment
	Cocaine addiction
	Dilated cardiomyopathy
	Dopaminergic synapse
	ECM-receptor interaction
	Gastric acid secretion
	Glutamatergic synapse
	Hypertrophic cardiomyopathy
	Protein digestion and absorption
	Rap1 signaling pathway
	Thyroid hormone synthesis
	cAMP signaling pathway
MTC_GSE27155 – MTC_GSE196264	MAPK signaling pathway
(143 pathways)	Pathways in cancer
	Focal adhesion
	PI3K-Akt signaling pathway
	Axon guidance
	Proteoglycans in cancer
	Human papillomavirus infection
	Relaxin signaling pathway
	AGE-RAGE signaling pathway in diabetic complications
	Cell adhesion molecules
	Transcriptional misregulation in cancer
	TGF-beta signaling pathway
	Chemical carcinogenesis
	Breast cancer
	Phospholipase D signaling pathway
	Cellular senescence
	Growth hormone synthesis secretion and action
	Ras signaling pathway
	Prostate cancer
	Amphetamine addiction
	Small cell lung cancer
	Glioma
	Estrogen signaling pathway
	Th17 cell differentiation
	Fluid shear stress and atherosclerosis
	AMPK signaling pathway
	Thyroid hormone signaling pathway
	Type II diabetes mellitus
	Gastric cancer
	Leukocyte transendothelial migration
	Bacterial invasion of epithelial cells
	Oxytocin signaling pathway
	Regulation of lipolysis in adipocytes
	Aldosterone synthesis and secretion
	FoxO signaling pathway
	Neurotrophin signaling pathway
	Renin secretion
	Cholinergic synapse
	Human cytomegalovirus infection
	Osteoclast differentiation
	Chronic myeloid leukemia
	Central carbon metabolism in cancer
	Cushing syndrome
	Amoebiasis
	Chagas disease
	Endocytosis
	Non-small cell lung cancer
	Platelet activation
	Insulin secretion
	Hepatocellular carcinoma
	GnRH signaling pathway
	Tight junction
	Hippo signaling pathway
	Gap junction
	Pancreatic cancer
	GABAergic synapse
	Regulation of actin cytoskeleton
	Fc gamma R-mediated phagocytosis
	Choline metabolism in cancer
	Inflammatory mediator regulation of TRP channels
	ErbB signaling pathway
	Valine leucine and isoleucine degradation
	Thyroid cancer
	Parathyroid hormone synthesis secretion and action
	Colorectal cancer
	Type I diabetes mellitus
	Histidine metabolism
	Melanogenesis
	Arginine and proline metabolism
	Longevity regulating pathway
	Human T-cell leukemia virus 1 infection
	Prolactin signaling pathway
	GnRH secretion
	C-type lectin receptor signaling pathway
	Leishmaniasis
	Sphingolipid signaling pathway
	Cortisol synthesis and secretion
	Kaposi sarcoma-associated herpesvirus infection
	VEGF signaling pathway
	Melanoma
	Epstein-Barr virus infection
	Progesterone-mediated oocyte maturation
	beta-Alanine metabolism
	Long-term depression
	Wnt signaling pathway
	Acute myeloid leukemia
	Long-term potentiation
	Insulin signaling pathway
	Pathogenic Escherichia coli infection
	PPAR signaling pathway
	Aldosterone-regulated sodium reabsorption
	Fatty acid degradation
	T cell receptor signaling pathway
	Phosphatidylinositol signaling system
	TNF signaling pathway
	Toxoplasmosis
	Biosynthesis of unsaturated fatty acids
	Serotonergic synapse
	Lysosome
	Fructose and mannose metabolism
	Signaling pathways regulating pluripotency of stem cells
	Th1 and Th2 cell differentiation
	Glucagon signaling pathway
	Oocyte meiosis
	cGMP-PKG signaling pathway
	Apelin signaling pathway
	Notch signaling pathway
	Alzheimer disease
	Insulin resistance
	Autoimmune thyroid disease
	HIF-1 signaling pathway
	Mineral absorption
	Hepatitis B
	Pathways of neurodegeneration
	Tryptophan metabolism
	Apoptosis
	Lipid and atherosclerosis
	Alanine aspartate and glutamate metabolism
	Malaria
	Autophagy
	Prion disease
	Adherens junction
	Vasopressin-regulated water reabsorption
	Rheumatoid arthritis
	Endometrial cancer
	Diabetic cardiomyopathy
	Human immunodeficiency virus 1 infection
	Inositol phosphate metabolism
	p53 signaling pathway
	Vascular smooth muscle contraction
	Glycosaminoglycan biosynthesis
	Glycolysis / Gluconeogenesis
	Fatty acid elongation
	Viral myocarditis
	PD-L1 expression and PD-1 checkpoint pathway in cancer
	Pyruvate metabolism
	Phagosome
	Yersinia infection
	Renal cell carcinoma
	Hematopoietic cell lineage
	Basal cell carcinoma
	Drug metabolism
	Tyrosine metabolism
MTC_GSE196264 – MTC_GSE27155	Glycine serine and threonine metabolism
(3 pathways)	Nicotine addiction
	Synaptic vesicle cycle

## Sheet: 3d. Gene Ontology Analysis 
Supplementary Table 3d: Gene Ontology analysis of transcriptomic datasets associated with MTC (disease vs normal) (Adj P-value<0.05)
GSE27155			GSE196264
Molecular Function	Cellular Component	Biological Process	Molecular Function	Cellular Component	Biological Process
Metal Ion Binding	Neuron Projection	Axon Guidance	Voltage-Gated Potassium Channel Activity	Collagen-Containing Extracellular Matrix	Monoatomic Cation Transmembrane Transport
Adenylate Cyclase Regulator Activity	Axon	Cell Surface Receptor Protein Tyrosine Kinase Signaling Pathway	Voltage-Gated Monoatomic Cation Channel Activity	Neuron Projection	Axonogenesis
Calcium Ion Binding	Dendrite	Axonogenesis	Sodium Channel Activity	Dense Core Granule	Inorganic Cation Transmembrane Transport
Protein Kinase Binding	Asymmetric Synapse	Nervous System Development	Potassium Channel Activity	Axon	Axon Guidance
Protein Homodimerization Activity	Membrane Raft	Regulation of Epithelial to Mesenchymal Transition	Voltage-Gated Sodium Channel Activity	Exocytic Vesicle Membrane	Neurotransmitter Secretion
Actin Binding	Vesicle	Positive Regulation of Cell Differentiation	Chloride Transmembrane Transporter Activity	Synaptic Vesicle Membrane	Neuron Projection Guidance
Transmembrane Receptor Protein Tyrosine Kinase Activity	Collagen-Containing Extracellular Matrix	Neuron Projection Guidance	Phosphatidylinositol-4,5-Bisphosphate Binding	Basement Membrane	Modulation of Chemical Synaptic Transmission
Cell-Cell Adhesion Mediator Activity	Cell-Cell Junction	Positive Regulation of Cell Migration	Anion Binding	Potassium Channel Complex	Metal Ion Transport
Kinase Binding	Basolateral Plasma Membrane	Regulation of MAPK Cascade	Monoatomic Cation Channel Activity	Voltage-Gated Potassium Channel Complex	Chemical Synaptic Transmission
Syntaxin-1 Binding	Postsynaptic Density	Positive Regulation of MAPK Cascade	Monoatomic Anion Channel Activity	Basolateral Plasma Membrane	Extracellular Matrix Organization
Cell Adhesion Mediator Activity	Focal Adhesion	Synapse Organization	Cell Adhesion Mediator Activity	Voltage-Gated Sodium Channel Complex	Potassium Ion Transmembrane Transport
Insulin-Like Growth Factor Receptor Binding	Exocytic Vesicle Membrane	Positive Regulation of Multicellular Organismal Process	Phosphatidylinositol Bisphosphate Binding	Dendrite	Potassium Ion Transport
Protein Phosphatase Regulator Activity	Synaptic Vesicle Membrane	Regulation of ERK1 and ERK2 Cascade	Calcium Channel Activity	Secretory Vesicle	Synaptic Vesicle Exocytosis
Sodium Channel Regulator Activity	Cell-Substrate Junction	Regulation of Cell Migration	Potassium Ion Transmembrane Transporter Activity	Plasma Membrane Raft	Cell Surface Receptor Protein Tyrosine Kinase Signaling Pathway
Protein Kinase Activator Activity	Polymeric Cytoskeletal Fiber	Positive Regulation of Cell Population Proliferation	Voltage-Gated Calcium Channel Activity	Specific Granule Lumen	Sodium Ion Transmembrane Transport
Insulin Receptor Binding	Bounding Membrane of Organelle	Positive Regulation of Cellular Process	Syntaxin-1 Binding	Sodium Channel Complex	Signal Release From Synapse
NAD Binding	Adherens Junction	Regulation of Neuron Projection Development		Secretory Granule Membrane	Action Potential
GTPase Activator Activity	Secretory Granule Lumen	Regulation of Cold-Induced Thermogenesis		Endoplasmic Reticulum Lumen	Positive Regulation of Cell Migration
Ion Channel Inhibitor Activity	Cytoplasmic Vesicle Membrane	Regulation of Cell Population Proliferation		Exocytic Vesicle	Nervous System Development
Protein Tyrosine Kinase Binding	Platelet Alpha Granule	Negative Regulation of Multicellular Organismal Process		Postsynaptic Density	Regulation of Calcium Ion-Dependent Exocytosis
Sulfur Amino Acid Transmembrane Transporter Activity	Cytoskeleton	Generation of Neurons		Calcium Channel Complex	Inorganic Cation Import Across Plasma Membrane
Protein Serine/Threonine Kinase Activator Activity	Actin Cytoskeleton	Regulation of Anatomical Structure Morphogenesis			Calcium Ion Homeostasis
Adenyl Nucleotide Binding	Endoplasmic Reticulum Lumen	Neuron Migration			Positive Regulation of Cell Differentiation
Actinin Binding	Neuromuscular Junction	Neuron Development			Thyroid Hormone Metabolic Process
Kinesin Binding	Cortical Actin Cytoskeleton	Positive Regulation of Intracellular Signal Transduction			Potassium Ion Import Across Plasma Membrane
Ion Channel Regulator Activity	Actin Filament	Protein Phosphorylation			Synaptic Transmission, Glutamatergic
Anion Binding	Calcium Channel Complex	Positive Regulation of DNA-templated Transcription			Cardiac Muscle Cell Action Potential
Transmembrane Receptor Protein Kinase Activity	Cortical Cytoskeleton	Positive Regulation of Transcription by RNA Polymerase II			Regulation of Secretion by Cell
Protein Serine Kinase Activity	Glutamatergic Synapse	Negative Regulation of Cell Differentiation			Fatty Acid Transport
Ephrin Receptor Binding	Microtubule	Positive Regulation of Neuron Projection Development			Synaptic Vesicle Cycle
High Voltage-Gated Calcium Channel Activity	Basement Membrane	Cellular Response to Peptide Hormone Stimulus			Melanocyte Differentiation
RNA Polymerase II-specific DNA-binding Transcription Factor Binding	Lysosome	Positive Regulation of Cell Motility			Thyroid Hormone Generation
GTPase Regulator Activity	Phosphatidylinositol 3-Kinase Complex, Class I	Positive Regulation of Developmental Process			Eye Development
Protein Tyrosine Kinase Activity	Phosphatidylinositol 3-Kinase Complex, Class IA	Neuron Differentiation			Intracellular Monoatomic Cation Homeostasis
GTPase Activity	Axonal Growth Cone	Circulatory System Development			Regulation of Synaptic Transmission, Glutamatergic
Ribonucleoside Triphosphate Phosphatase Activity	Intracellular Organelle Lumen	Modulation of Chemical Synaptic Transmission			Central Nervous System Development
Calcium Channel Regulator Activity	Apical Dendrite	+ Reg of Phosphatidylinositol 3-Kinase/Prot Kinase B Signal Transduction			Regulation of Cell-Substrate Adhesion
Aldehyde Dehydrogenase [NAD+] Activity	Extracellular Vesicle	Regulation of Actin Filament-Based Process			Embryonic Digestive Tract Development
Syntaxin Binding	Secretory Granule Membrane	Positive Regulation of Epithelial to Mesenchymal Transition			Cardiac Conduction
DNA-binding Transcription Factor Binding	Dense Core Granule	Homophilic Cell Adhesion via Plasma Membrane Adhesion Molecules			Regulation of Catecholamine Secretion
	Filopodium	Regulation of Filopodium Assembly			Catecholamine Biosynthetic Process
	Early Endosome Membrane	Cellular Response to Oxygen-Containing Compound			External Encapsulating Structure Organization
	Microvillus	Negative Regulation of Apoptotic Process			Extracellular Structure Organization
	Vacuolar Lumen	Positive Regulation of Cold-Induced Thermogenesis			Glutamate Receptor Signaling Pathway
	Extracellular Membrane-Bounded Organelle	Cellular Response to Copper Ion			Chloride Transport
	Endosome Membrane	Cardiac Muscle Cell Action Potential Involved in Contraction			Regulation of Wnt Signaling Pathway, Planar Cell Polarity Pathway
	Lysosomal Lumen	Positive Regulation of Epithelial Cell Proliferation			Learning
	Spindle	Response to Copper Ion			Regulated Exocytosis
	Cell-Cell Contact Zone	SMAD Protein Signal Transduction			Regulation of Regulated Secretory Pathway
	Clathrin-Coated Vesicle Membrane	Cell-Cell Adhesion via Plasma-Membrane Adhesion Molecules			Retinoid Metabolic Process
	Clathrin-Sculpted Gamma-Aminobutyric Acid Transport Vesicle	Negative Regulation of Transcription by RNA Polymerase II			Atrial Cardiac Muscle Cell Action Potential
	Clathrin-Sculpted Gamma-Aminobutyric Acid Transport Vesicle Membrane	Negative Regulation of Ossification			Regulation of Insulin Secretion
	Intracellular Vesicle	Positive Regulation of Response to Wounding			Regulation of Cold-Induced Thermogenesis
	Golgi Membrane	Positive Regulation of Cell Projection Organization			Transport Across Blood-Brain Barrier
	Platelet Alpha Granule Membrane	Regulation of Phosphatidylinositol 3-Kinase/Protein Kinase B Signal Transduction			Cardiac Muscle Cell Contraction
	Specific Granule	Positive Regulation of ERK1 and ERK2 Cascade			Cellular Response to Copper Ion
	Platelet Alpha Granule Lumen	Regulation of Fat Cell Differentiation			Positive Regulation of Epithelial Cell Proliferation
	Nuclear Membrane	Neuron Projection Development			Embryonic Organ Development
	Actin-Based Cell Projection	Positive Regulation of Metabolic Process			Sodium Ion Transport
	Mitotic Spindle	Cellular Response to Transforming Growth Factor Beta Stimulus			Lung Development
	Tight Junction	Regulation of Actin Cytoskeleton Organization			Skeletal System Development
	Sarcoplasmic Reticulum	Negative Regulation of Signal Transduction			Regulation of Heart Rate by Cardiac Conduction
	Neuron to Neuron Synapse	Transforming Growth Factor Beta Receptor Signaling Pathway			Regulation of Neurotransmitter Secretion
	Early Endosome	Regulation of Intracellular Signal Transduction			Intracellular Zinc Ion Homeostasis
	Cytoplasmic Side of Plasma Membrane	Regulation of Cytoskeleton Organization			Positive Regulation of Cell Motility
		Regulation of Substrate Adhesion-Dependent Cell Spreading			Cell-Cell Adhesion via Plasma-Membrane Adhesion Molecules
		Plasma Membrane Bounded Cell Projection Organization			Regulation of ERK1 and ERK2 Cascade
		Regulation of Cell Differentiation			Positive Regulation of Multicellular Organismal Process
		Actin Filament Bundle Assembly			Regulation of Exocytosis
		Cytoskeleton Organization			Vascular Transport
		Maintenance of Blood-Brain Barrier			Negative Regulation of Peptide Hormone Secretion
		Synapse Assembly			Vitamin A Metabolic Process
		Regulation of Epithelial Cell Proliferation			Cardiac Muscle Cell Action Potential Involved in Contraction
		Regulation of Bone Mineralization			Calcium Ion Transport
		Actin Filament Bundle Organization			Receptor-Mediated Endocytosis of Virus by Host Cell
		Regulation of Endothelial Cell Migration			Monoatomic Anion Transmembrane Transport
		Regulation of Wound Healing			Embryonic Organ Morphogenesis
		Regulation of Apoptotic Process			Chloride Transmembrane Transport
		Cell-Matrix Adhesion			Positive Regulation of Cell-Substrate Adhesion
		Cell Junction Assembly			Diterpenoid Metabolic Process
		Retinoic Acid Receptor Signaling Pathway			Anterograde Trans-Synaptic Signaling
		Transforming Growth Factor Beta Receptor Superfamily Signaling Pathway
		Positive Regulation of Cell-Matrix Adhesion
		Enzyme-Linked Receptor Protein Signaling Pathway
		Positive Regulation of Cell-Substrate Adhesion
		Chemical Synaptic Transmission
		Regulation of Cell Adhesion
		Negative Regulation of Plasma Membrane Bounded Cell Projection Assembly
		Regulation of Signal Transduction
		Regulation of Microtubule Polymerization or Depolymerization
		Cellular Response to Growth Factor Stimulus
		Neuron Projection Morphogenesis
		Negative Regulation of Fat Cell Differentiation
		Heart Development
		Positive Regulation of Signal Transduction
		Long-Term Synaptic Potentiation
		Ephrin Receptor Signaling Pathway
		Negative Regulation of Microtubule Polymerization
		Phosphorylation
		Positive Regulation of Intracellular Transport
		Response to Cadmium Ion
		Positive Regulation of Wound Healing
		Regulated Exocytosis
		Regulation of Ossification
		Positive Regulation of Synaptic Transmission
		Commissural Neuron Axon Guidance
		Regulation of Wound Healing, Spreading of Epidermal Cells
		Fatty Acid Transport
		Negative Regulation of Microtubule Polymerization or Depolymerization
		Protein Localization to Membrane
		Cell Surface Receptor Protein Serine/Threonine Kinase Signaling Pathway
		Central Nervous System Development
		Integrin-Mediated Signaling Pathway
		Neurotransmitter Secretion
		Positive Regulation of Extracellular Matrix Organization
		Epithelium Development
		Cellular Response to Cadmium Ion
		Cellular Response to Zinc Ion
		Regulation of Leukocyte Chemotaxis
		Ventricular Cardiac Muscle Cell Action Potential
		Small GTPase-mediated Signal Transduction
		Positive Regulation of Secretion by Cell
		Positive Regulation of Filopodium Assembly
		Regulation of Platelet Aggregation
		Apoptotic Process
		Negative Regulation of Epithelial to Mesenchymal Transition
		Negative Regulation of DNA-templated Transcription
		Sprouting Angiogenesis
		Hemopoiesis
		Regulation of Heart Contraction
		Exit From Mitosis
		Oxygen Transport
		Thyroid Hormone Generation
		Cellular Response to Insulin Stimulus
		Negative Regulation of Cellular Process
		Regulation of Focal Adhesion Assembly
		Regulation of Microtubule Polymerization
		Response to cAMP
		Wnt Signaling Pathway, Planar Cell Polarity Pathway
		Regulation of Cation Channel Activity
		Regulation of Integrin-Mediated Signaling Pathway
		Negative Regulation of Regulated Secretory Pathway
		Pyrimidine Nucleobase Catabolic Process
		Nuclear Receptor-Mediated Signaling Pathway
		Regulation of Postsynapse Organization
		Regulation of Potassium Ion Transmembrane Transporter Activity
		Positive Regulation of Apoptotic Process
		Non-Canonical Wnt Signaling Pathway
		Regulation of SMAD Protein Signal Transduction
		Response to Retinoic Acid
		Actin Filament Organization
		Regulation of Microtubule Cytoskeleton Organization
		Positive Regulation of Transport
		Intracellular Signaling Cassette
		Signal Release From Synapse
		Establishment of Endothelial Barrier
		Glial Cell Differentiation
		Hydrogen Peroxide Metabolic Process
		Cellular Component Assembly
		Supramolecular Fiber Organization
		Positive Regulation of Cell Adhesion
		Positive Regulation of Macromolecule Biosynthetic Process
		Negative Regulation of Cell Population Proliferation
		Catecholamine Biosynthetic Process
		Myeloid Leukocyte Differentiation
		Regulation of Cardiac Muscle Contraction
		Endothelial Cell Development
		Monocarboxylic Acid Metabolic Process
		Regulation of GTPase Activity
		Intracellular Zinc Ion Homeostasis
		Vascular Endothelial Growth Factor Receptor Signaling Pathway
		Endothelial Cell Migration
		Wound Healing
		Peptidyl-Serine Modification
		Positive Regulation of RNA Biosynthetic Process
		Hippo Signaling
		Neuromuscular Junction Development
		Regulation of Synaptic Transmission, GABAergic
		Negative Regulation of Supramolecular Fiber Organization
		Regulation of Neuron Differentiation
		T Cell Differentiation
		Peptidyl-Tyrosine Modification
		Neural Crest Cell Migration
		Positive Regulation of Substrate Adhesion-Dependent Cell Spreading
		Sphingosine-1-Phosphate Receptor Signaling Pathway
		Peptidyl-Serine Phosphorylation
		Dopamine Biosynthetic Process
		Eye Development
		Regulation of Muscle Cell Differentiation
		Wnt Signaling Pathway
		Fatty Acid Metabolic Process
		Odontogenesis
		Regulation of Heart Rate by Cardiac Conduction
		Regulation of Neurotransmitter Secretion
		Regulation of BMP Signaling Pathway
		Cellular Response to Corticosteroid Stimulus
		Thyroid Hormone Metabolic Process
		Phagocytosis
		Cardiac Conduction
		Positive Regulation of DNA-binding Transcription Factor Activity
		+ Reg of Transmembrane Receptor Prot Serine/Threonine Kinase Sgnlng Pway
		Positive Regulation of Small GTPase Mediated Signal Transduction
		Regulation of Cytosolic Calcium Ion Concentration
		Cell Chemotaxis
		Extracellular Matrix Organization
		Positive Regulation of Signaling
		Regulation of Dendritic Spine Morphogenesis
		Cellular Response to Retinoic Acid
		Positive Regulation of Neuron Differentiation
		Blood Vessel Endothelial Cell Migration
		Cell Morphogenesis Involved in Neuron Differentiation
		Positive Regulation of Osteoblast Differentiation
		Regulation of Exocytosis
		Negative Regulation of Neuron Projection Development
		Regulation of Osteoblast Differentiation
		Negative Regulation of Cytokine Production
		Cellular Response to Nitrogen Compound
		Negative Regulation of Cell Migration
		Regulation of Sodium Ion Transport
		Embryonic Organ Development
		Negative Regulation of Cellular Response to Growth Factor Stimulus
		Transport Across Blood-Brain Barrier
		Positive Regulation of Glial Cell Differentiation
		Reg of Cardiac Muscle Contraction by Reg of the Release of Sequestered Calcium Ion
		Regulation of Dendrite Development
		Proteoglycan Biosynthetic Process
		Regulation of Insulin Receptor Signaling Pathway
		Axon Development
		Protein Modification Process
		Negative Regulation of miRNA Metabolic Process
		Positive Regulation of Neural Precursor Cell Proliferation
		Positive Regulation of Vacuole Organization
		Oxidative Demethylation
		Negative Regulation of Alcohol Biosynthetic Process
		Negative Regulation of Bone Mineralization
		Positive Regulation of Calcium Ion Import
		Regulation of Vasculogenesis
		Positive Regulation of Bone Mineralization
		Receptor-Mediated Endocytosis
		Positive Regulation of Programmed Cell Death
		Learning
		Positive Regulation of Endothelial Cell Migration
		Positive Regulation of Leukocyte Chemotaxis
		Negative Regulation of ERK1 and ERK2 Cascade
		Positive Regulation of Cell-Cell Adhesion
		Positive Regulation of Fat Cell Differentiation
		Regulation of Stress Fiber Assembly
		Regulation of Cell Adhesion Mediated by Integrin
		Cell Junction Organization
		Response to Insulin
		Regulation of Cellular Component Organization
		Extracellular Matrix Assembly
		Regulation of Vascular Endothelial Cell Proliferation
		Negative Regulation of Protein Polymerization
		Phosphatidylinositol 3-Kinase/Protein Kinase B Signal Transduction
		Positive Regulation of Protein Localization to Membrane
		Artery Development
		Positive Regulation of Cell-Substrate Junction Organization
		Insulin Receptor Signaling Pathway
		Negative Regulation of Cell Projection Organization
		Calcium Ion-Regulated Exocytosis of Neurotransmitter
		Inositol Metabolic Process
		Nucleobase Catabolic Process
		Regulation of Aldosterone Biosynthetic Process
		Regulation of Cortisol Biosynthetic Process
		Regulation of Superoxide Metabolic Process
		Regulation of Type B Pancreatic Cell Proliferation
		Retinal Ganglion Cell Axon Guidance
		Fatty Acid Biosynthetic Process
		Positive Regulation of Plasma Membrane Bounded Cell Projection Assembly
		Muscle Contraction
		Mesenchymal Cell Differentiation
		Peptidyl-Tyrosine Phosphorylation
		Microvillus Assembly
		Homotypic Cell-Cell Adhesion
		Positive Regulation of Chemotaxis
		Regulation of Calcium Ion-Dependent Exocytosis
		Negative Regulation of Programmed Cell Death
		Calcium Ion Homeostasis
		Induction of Positive Chemotaxis
		Melanocyte Differentiation
		Regulation of DNA-templated Transcription Initiation
		Fat Cell Differentiation
		Regulation of Phosphorylation
		Outflow Tract Septum Morphogenesis
		Regulation of Release of Sequestered Calcium Ion Into Cytosol by Sarcoplasmic Reticulum
		Response to Ketone
		Embryonic Digestive Tract Development
		Negative Regulation of Peptide Hormone Secretion
		Positive Regulation of Axon Extension
		Regulation of Rac Protein Signal Transduction
		Negative Regulation of MAPK Cascade
		Acetylcholine Receptor Signaling Pathway
		Cellular Response to cAMP
		Platelet Aggregation
		Substrate Adhesion-Dependent Cell Spreading
		Negative Regulation of Cold-Induced Thermogenesis
		Regulation of miRNA Transcription
		Regulation of Insulin Secretion
		T Cell Activation
		Regulation of Angiogenesis
		Protein Localization to Cell Periphery
		- Reg of Transmembrane Receptor Prot Serine/Threonine Kinase Sgnlng Pway
		Cellular Response to Vascular Endothelial Growth Factor Stimulus
		Glutamate Receptor Signaling Pathway
		Negative Regulation of Smooth Muscle Cell Proliferation
		Regulation of Blood Circulation
		Regulation of Endothelial Cell Proliferation
		Gas Transport
		Negative Regulation of Growth
		Anterograde Trans-Synaptic Signaling
		Dopaminergic Neuron Differentiation
		Negative Regulation of miRNA Transcription
		Regulation of Protein Targeting to Membrane
		Response to Purine-Containing Compound
		Notch Signaling Pathway
		Positive Regulation of Ossification
		Skeletal Muscle Tissue Development
		Calcium Ion Transmembrane Import Into Cytosol
		Heart Trabecula Morphogenesis
		Hydrogen Peroxide Catabolic Process
		Negative Regulation of Leukocyte Mediated Cytotoxicity
		Positive Regulation of Protein Targeting to Membrane
		Skeletal System Development
		Response to Calcium Ion
		Positive Regulation of Catabolic Process
		Negative Regulation of Insulin Receptor Signaling Pathway
		Positive Regulation of D-glucose Transmembrane Transport
		Action Potential
		Elastic Fiber Assembly
		Glycine Metabolic Process
		Non-Proteinogenic Amino Acid Biosynthetic Process
		Positive Regulation of Rac Protein Signal Transduction
		Positive Regulation of Extracellular Matrix Disassembly
		Positive Regulation of Synapse Maturation
		Pyrimidine-Containing Compound Catabolic Process
		Carnitine Metabolic Process
		Central Nervous System Projection Neuron Axonogenesis
		Positive Regulation of Platelet Aggregation
		Pyrimidine Nucleobase Metabolic Process
		Regulation of Adipose Tissue Development
		Regulation of Axon Regeneration
		Regulation of Synapse Maturation
		Cardiac Muscle Cell Action Potential
		Negative Regulation of Endothelial Cell Migration
		Positive Regulation of Biomineral Tissue Development
		Epithelial Cell Differentiation
		Negative Regulation of Lipid Biosynthetic Process
		Cellular Response to Fibroblast Growth Factor Stimulus
		Receptor Internalization
		Lymphocyte Differentiation
		Positive Regulation of Gene Expression
		Cellular Response to Nerve Growth Factor Stimulus
		Negative Regulation of Biomineral Tissue Development
		Pulmonary Valve Development
		Regulation of Cardiac Muscle Cell Membrane Repolarization
		Regulation of Dendritic Spine Development
		Regulation of Synaptic Vesicle Exocytosis
		Regulation of Protein Localization to Plasma Membrane
		Membrane Depolarization During Cardiac Muscle Cell Action Potential
		Positive Regulation of Lipid Storage
		Positive Regulation of Positive Chemotaxis
		Regulation of Stem Cell Proliferation
		Negative Regulation of Cellular Response to Insulin Stimulus
		Embryonic Organ Morphogenesis
		Regulation of Autophagosome Assembly
		Negative Regulation of Endothelial Cell Proliferation
		Positive Regulation of Exocytosis
		Regulation of Synapse Organization
		Regulation of Vascular Associated Smooth Muscle Cell Proliferation
		Positive Regulation of Endothelial Cell Proliferation
		Cellular Response to Metal Ion
		Cellular Response to Lipid
		Positive Regulation of Hydrolase Activity
		Vascular Transport
		Blood Vessel Morphogenesis
		Epithelial to Mesenchymal Transition
		Regulation of Secretion by Cell
		Monocarboxylic Acid Biosynthetic Process
		Cardiac Muscle Cell Contraction
		Regulation of Keratinocyte Proliferation
		Striated Muscle Cell Development
		Lipid Transport
		Negative Regulation of BMP Signaling Pathway
		Response to Amyloid-Beta
		Negative Regulation of Cell-Substrate Adhesion
		Positive Regulation of SMAD Protein Signal Transduction
		Actomyosin Structure Organization
		Axonal Fasciculation
		Detection of Calcium Ion
		Glial Cell-Derived Neurotrophic Factor Receptor Signaling Pathway
		Negative Regulation of Substrate Adhesion-Dependent Cell Spreading
		Regulation of Astrocyte Differentiation
		Regulation of Transforming Growth Factor Beta Production

## Sheet: 3e. TFs and Kinases
Supplementary Table 3e: Significant Transcription Factors (TFs) and Kinases of human transcriptomic datasets associated with MTC (disease vs normal) (Adj P-value<0.05)
GSE27155				GSE196264
Transcription Factors	P-value	Kinases	P-value	Transcription Factors	P-value	Kinases	P-value
SUZ12	3.43e-20	HIPK2	8.93e-16	SUZ12	5.37e-32	CDK4	3.46e-14
AR	2.16e-13	MAPK1	5.99e-15	REST	9.32e-29	MAPK1	2.4e-12
REST	2.18e-12	CDK4	2.09e-13	REST	1.51e-20	CSNK2A1	5.68e-12
NFE2L2	2.6e-11	MAPK3	4.3e-13	AR	5.15e-10	HIPK2	6.1e-12
SOX2	9.68e-11	AKT1	7.72e-13	SOX2	6.86e-09	CDK1	2.79e-11
GATA1	2.28e-10	CSNK2A1	1.41e-12	EZH2	6.72e-08	MAPK14	9.29e-11
SALL4	7.26e-10	MAPK14	8.04e-12	TCF3	9.06e-07	ERK2	3.13e-10
REST	1.98e-09	ERK1	3.05e-11	EZH2	3.712e-06	AKT1	3.67e-10
SMAD4	5.65e-07	ERK2	1.89e-10	SMAD4	0.000188	GSK3B	4.44e-10
TCF3	7.37e-07	CDK1	6.17e-10	SALL4	0.0002054	MAPK3	1.49e-09
TP63	7.85e-07	GSK3B	6.89e-10	ESR1	0.0002242	CDK2	7.46e-09
ESR1	1.4e-06	PKBALPHA	1.02e-08	NANOG	0.0004833	GSK3BETA	1.35e-08
GATA2	2.95e-06	CDK2	2.15e-08	NFE2L2	0.0008259	ERK1	4.58e-08
TRIM28	1.4e-05	GSK3BETA	1.16e-07	TP63	0.003845	CK2ALPHA	4.9e-07
RUNX1	3.29e-05	JNK1	1.5e-07	GATA1	0.004105	DNAPK	4.475e-06
NANOG	0.000374	CK2ALPHA	2.71e-07	GATA2	0.007589	PKBALPHA	5.588e-06
TP53	0.000688	PRKCZ	1.27e-06	POU5F1	0.01144	TGFBR2	2.183e-05
STAT3	0.001181	ATM	2.36e-06			UHMK1	2.954e-05
CEBPB	0.002361	TGFBR2	5.82e-06			MAPK8	5.749e-05
KLF4	0.003192	DNAPK	7.95e-06			JNK1	6.758e-05
SMC3	0.004295	MAPK8	8.43e-06			ATM	9.547e-05
NELFE	0.005533	PRKCA	1.45e-05			ABL1	0.0001166
PPARG	0.009812	ABL1	2.38e-05			PKBBETA	0.0002366
CTCF	0.01179	CDC2	5.51e-05			MAP2K3	0.000259
EGR1	0.02291	CDK5	5.55e-05			GSK3ALPHA	0.0003361
POU5F1	0.02428	PRKCD	5.68e-05			CDC2	0.0003406
FOSL2	0.03129	RPS6KA3	6.22e-05			GSK	0.0003732
TCF3	0.03955	NLK	7.62e-05			PRKCZ	0.0003946
		PKBBETA	9.22e-05			PIM1	0.0003963
		GSK3ALPHA	0.000132			CSNK1E	0.0007221
		CHUK	0.000141			RAF1	0.0007274
		PIM1	0.000156			CDK9	0.0007289
		PKBGAMMA	0.000173			CDK7	0.001724
		UHMK1	0.000196			NLK	0.00191
		JNK2	0.000248			SRC	0.002117
		SRC	0.000306			TBK1	0.00214
		CDK9	0.000342			IKBKE	0.002255
		PRKAA1	0.000464			CAM	0.002373
		TBK1	0.000878			IKKALPHA	0.002702
		IKBKE	0.000926			CHUK	0.002758
		AURKA	0.001084			MELK	0.00409
		MAP2K3	0.001141			CDK8	0.004492
		CHEK2	0.001226			CAMK4	0.004919
		RAF1	0.001337			CDK5	0.005063
		IKKALPHA	0.001528			MAP3K7	0.005167
		CAM	0.001602			JNK2	0.005842
		IKK	0.001602			PRKAA1	0.007071
		PRKACA	0.001993			CAMKIV	0.0072
		MAP3K7	0.002184			PRKDC	0.008186
		MELK	0.002326			ERBB2	0.008186
		CDK8	0.002559			MTOR	0.008787
		GSK	0.002559			RET	0.009205
		CDK6	0.002806			PRKACA	0.009464
		PRKCB	0.002856			BRD2	0.009788
		CAMK2D	0.003067			MARK2	0.009854
		CDK3	0.003342			CHEK1	0.01083
		PRKDC	0.003526			RPS6KA5	0.01196
		CK2	0.003608			ACTR2B	0.01273
		CHEK1	0.003681			RPS6KA1	0.01305
		PDHK1	0.004187			RPS6KA3	0.01521
		MAP2K1	0.004607			IKKBETA	0.01601
		CAMKIV	0.00489			IKBKB	0.01836
		RET	0.005311			GSK3A	0.01973
		MARK2	0.005694			ROR1	0.0215
		BARK1	0.005779			LRRK1	0.0215
		CAMK2A	0.005934			ACVR2B	0.0215
		DYRK2	0.006094			FOXO3	0.02165
		PKC	0.006569			TRIM33	0.02165
		RPS6KA1	0.006569			LYK5	0.02165
		CSNK1A1	0.006848			PIKFYVE	0.02165
		AURORAA	0.007134			JAK2	0.02176
		EGFR	0.007862			PRKCD	0.02292
		CK1ALPHA	0.008359			PKA	0.02349
		ACTR2B	0.008689			PIM3	0.02555
		CSNK2A2	0.009322			PRKCB	0.02823
		IKKBETA	0.009355			ERBB3	0.0285
		IKBKB	0.009363			MERTK	0.02987
		PRKCI	0.01044			DYRK3	0.02987
		GSK3A	0.0116			TGFBR1	0.03096
		JAK2	0.01282			PKD1	0.03223
		ACVR2B	0.01477			CK2A2	0.03354
		PKA	0.01616			EPHA8	0.03446
		PIM3	0.0176			ILK	0.03686
		FOXO3	0.01777			PKAALPHA	0.03837
		TRIM33	0.01777			CK2	0.04044
		LYK5	0.01777			PKBGAMMA	0.04183
		PIKFYVE	0.01777			TNK2	0.04183
		CSNK1E	0.01924			PAK1	0.04366
		PKD1	0.01924			DYRK1B	0.0444
		CK2A2	0.02005			CDK6	0.0444
		MERTK	0.02063			PDHK1	0.04491
		PAK5	0.02222			PRKCA	0.04518
		MAP3K8	0.02257			MAPK11	0.04702
		SGK1	0.02257			CAMK2D	0.04704
		PIM2	0.02386			MAP2K1	0.04802
		EPHA8	0.02386			PRKD1	0.04961
		MAPK11	0.02515			CDK3	0.04973
		ILK	0.02555			AXL	0.04973
		TNK2	0.02907			FER	0.04973
		PRKD1	0.03011
		DYRK1B	0.0309
		CAMK4	0.0309
		PRKACB	0.03277
		PAK2	0.03324
		AXL	0.03469
		FER	0.03469
		BMPR1B	0.03865
		MAP3K5	0.04277
		PAK6	0.04277
		PKG1CGKI	0.04489
		ALK	0.04705
		MAPK9	0.04867
