# Supplementary material for: A Pan-omics Systems Biology Perspective Identifies Calcium Signaling Pathway Critical in Medullary Thyroid Cancer
Source: Research Square preprint supplement (doi:10.21203/rs.3.rs-6926629/v1), 2025-07-27
Supplement: Supplementary file 6 [file ab6aaca0c52a454bae810dd9.docx]

| **Term** | **P-value** | **Adjusted P-value** |
| --- | --- | --- |
| Thyroid cancer | 3.33E-06 | 4.00E-05 |
| Central carbon metabolism in cancer | 1.21E-05 | 7.24E-05 |
| Calcium signaling pathway | 1.43E-04 | 5.74E-04 |
| Pathways in cancer | 7.04E-04 | 0.002111 |
| Non-small cell lung cancer | 0.00719 | 0.017249 |
| Inflammatory mediator regulation of TRP channels | 0.00978 | 0.019552 |
| Neurotrophin signaling pathway | 0.01187 | 0.02034 |
| Apoptosis | 0.01415 | 0.021225 |
| Transcriptional misregulation in cancer | 0.01911 | 0.025478 |
| Ras signaling pathway | 0.02307 | 0.027679 |
| MAPK signaling pathway | 0.02918 | 0.031838 |
| PI3K-Akt signaling pathway | 0.03509 | 0.035087 |

**Supplementary Table 2: Significant KEGG pathways enriched by the MTC associated SNPs (Adj. P-value<0.05)**
