# Supplementary material for: A Pan-omics Systems Biology Perspective Identifies Calcium Signaling Pathway Critical in Medullary Thyroid Cancer
Source: Research Square preprint supplement (doi:10.21203/rs.3.rs-6926629/v1), 2025-07-27
Supplement: Supplementary file 7 [file c2eab9ba88c109d68fdb8426.docx]

Supplementary Table 1: Analysis of MTC associated SNPs from DisGeNET by SIFT and PolyPhen2

| **Variation ID** | **SIFT** | | **PolyPhen-2** | |
| --- | --- | --- | --- | --- |
| **Score** | **Prediction** | **Score** | **Prediction** |
| rs779943666 | 1 | Tolerated - Low Confidence | 0.188 | Benign |
| rs757031354 | 0.08 | Tolerated | 0.197 | Benign |
| rs1306924167 | 0.2 | Tolerated | 0.014 | Benign |
| rs138608619 | 0.04 | Deleterious | 0.67 | Possibly Damaging |
| rs547972574 | 0.5 | Tolerated | 0.353 | Benign |
| rs761247634 | 0.01 | Deleterious | 0.867 | Possibly Damaging |
| rs760222071 | 0.14 | Tolerated | 0.927 | Probably Damaging |
| rs764737760 | 0.02 | Deleterious | 0.474 | Possibly Damaging |
| rs1035934237 | 0.44 | Tolerated | 0.999 | Probably Damaging |
| rs764417252 | 0 | Deleterious | 0.999 | Probably Damaging |
| rs188270548 | 0 | Deleterious | 0.873 | Possibly Damaging |
| rs6336 | 0 | Deleterious | 0.955 | Probably Damaging |
| rs6339 | 0.06 | Tolerated | 0.255 | Benign |
| rs200022271 | 0.04 | Deleterious | 0.979 | Probably Damaging |
| rs145081333 | 0 | Deleterious | 1 | Probably Damaging |
| rs1366681125 | 0.35 | Tolerated - Low Confidence | 0.125 | Benign |
| rs779905135 | 0.01 | Deleterious - Low Confidence | 0.83 | Possibly Damaging |
| rs763526874 | 0.01 | Deleterious - Low Confidence | 0 | Benign |
| rs748402485 | 0.17 | Tolerated - Low Confidence | 0.26 | Benign |
| rs749390385 | 0.2 | Tolerated - Low Confidence | 0.782 | Possibly Damaging |
| rs1318325737 | 0.53 | Tolerated - Low Confidence | 0.018 | Benign |
| rs201244749 | 0.06 | Tolerated - Low Confidence | 0.034 | Benign |
| rs763295929 | 0 | Deleterious - Low Confidence | 0.933 | Probably Damaging |
| rs138265837 | 0.08 | Tolerated - Low Confidence | 0.666 | Possibly Damaging |
| rs551142665 | 0.11 | Tolerated - Low Confidence | 0.798 | Possibly Damaging |
| rs1311922451 | 0.28 | Tolerated - Low Confidence | 0.007 | Benign |
| rs150261092 | 0.02 | Deleterious | 0.289 | Benign |
| rs149403911 | 0.46 | Tolerated | 0.007 | Benign |
| rs864622361 | 0.01 | Deleterious | 0.999 | Probably Damaging |
| rs759229505 | 0.21 | Tolerated | 0.843 | Possibly Damaging |
| rs370736139 | 0.22 | Tolerated | 0.284 | Benign |
| rs144801580 | 0 | Deleterious | 1 | Probably Damaging |
| rs1210452561 | 0.19 | Tolerated | 0.566 | Possibly Damaging |
| rs1008123818 | 0.68 | Tolerated | 0.014 | Benign |
| rs76736111 | 0.02 | Deleterious | 0.614 | Possibly Damaging |
| rs898525501 | 0.52 | Tolerated | 0.007 | Benign |
| rs751572082 | 0.05 | Tolerated | 0.155 | Benign |
| rs1060500754 | 0.41 | Tolerated | 0 | Benign |
| rs1009392744 | 0.35 | Tolerated | 0 | Benign |
| rs937818626 | 0.2 | Tolerated | 0.261 | Benign |
| rs760813493 | 0.59 | Tolerated | 0 | Benign |
| rs756216318 | 0.36 | Tolerated | 0.001 | Benign |
| rs145970248 | 0.1 | Tolerated | 0.012 | Benign |
| rs780756440 | 0.14 | Tolerated | 0.025 | Benign |
| rs541929171 | 0.05 | Deleterious | 0.007 | Benign |
| rs1480040525 | 0.54 | Tolerated | 0.003 | Benign |
| rs77702891 | 0.11 | Tolerated | 0.422 | Benign |
| rs377767388 | 0.57 | Tolerated | 0.006 | Benign |
| rs863224778 | 0.7 | Tolerated | 0.003 | Benign |
| rs774829203 | 0.63 | Tolerated | 0.001 | Benign |
| rs777716061 | 0.41 | Tolerated | 0.014 | Benign |
| rs754116867 | 0.02 | Deleterious | 0.927 | Probably Damaging |
| rs199529397 | 0.05 | Deleterious | 0.077 | Benign |
| rs1394361948 | 0.11 | Tolerated | 0.234 | Benign |
| rs771679592 | 0.03 | Deleterious | 0.882 | Possibly Damaging |
| rs906695652 | 0.44 | Tolerated | 1 | Probably Damaging |
| rs371731991 | 0.25 | Tolerated | 0.2 | Benign |
| rs794727875 | 0.29 | Tolerated | 0.217 | Benign |
| rs774474422 | 0.78 | Tolerated | 0.025 | Benign |
| rs549907428 | 0.08 | Tolerated | 0.904 | Possibly Damaging |
| rs145966037 | 0.52 | Tolerated | 0.005 | Benign |
| rs200334340 | 0.03 | Deleterious | 0.997 | Probably Damaging |
| rs746512075 | 0.04 | Deleterious | 0.901 | Possibly Damaging |
| rs752322996 | 0.05 | Tolerated | 0.127 | Benign |
| rs375677628 | 0.43 | Tolerated | 0.003 | Benign |
| rs201553718 | 0.36 | Tolerated | 0.054 | Benign |
| rs1194200337 | 0.08 | Tolerated | 0.918 | Probably Damaging |
| rs545625150 | 0 | Deleterious | 0.446 | Possibly Damaging |
| rs75873440 | 0.05 | Deleterious | 1 | Probably Damaging |
| rs543376293 | 0.07 | Tolerated | 0.798 | Possibly Damaging |
| rs374461212 | 0.29 | Tolerated | 0.932 | Probably Damaging |
| rs147219360 | 0.07 | Tolerated | 0.949 | Probably Damaging |
| rs140464432 | 0.26 | Tolerated | 0.089 | Benign |
| rs144455821 | 0.93 | Tolerated | 0.117 | Benign |
| rs745418960 | 0.16 | Tolerated | 0.007 | Benign |
| rs1286776938 | 0.01 | Deleterious | 0.946 | Probably Damaging |
| rs77558292 | 0 | Deleterious | 0.999 | Probably Damaging |
| rs77939446 | 0 | Deleterious | 0.999 | Probably Damaging |
| rs377767391 | 0 | Deleterious | 0.999 | Probably Damaging |
| rs80069458 | 0 | Deleterious | 0.999 | Probably Damaging |
| rs76262710 | 0.01 | Deleterious | 0.882 | Possibly Damaging |
| rs79781594 | 0 | Deleterious | 0.807 | Possibly Damaging |
| rs77316810 | 0.03 | Deleterious | 0.999 | Probably Damaging |
| rs77503355 | 0 | Deleterious | 0.999 | Probably Damaging |
| rs377767405 | 0 | Deleterious | 0.997 | Probably Damaging |
| rs377767406 | 0.03 | Deleterious | 0.997 | Probably Damaging |
| rs267607010 | 0.57 | Tolerated | 0.888 | Possibly Damaging |
| rs75076352 | 0 | Deleterious | 0.993 | Probably Damaging |
| rs75996173 | 0 | Deleterious | 0.997 | Probably Damaging |
| rs776164321 | 0.01 | Deleterious | 0.977 | Probably Damaging |
| rs377767411 | 0 | Deleterious | 0.96 | Probably Damaging |
| rs77711105 | 0.97 | Tolerated | 0.003 | Benign |
| rs146646971 | 0 | Deleterious | 0.999 | Probably Damaging |
| rs776986585 | 0.08 | Tolerated | 0.995 | Probably Damaging |
| rs770100231 | 0.01 | Deleterious | 0.999 | Probably Damaging |
| rs1332256523 | 0.02 | Deleterious | 0.999 | Probably Damaging |
| rs927029236 | 0.06 | Tolerated | 0.954 | Probably Damaging |
| rs774983492 | 0.05 | Deleterious | 0.999 | Probably Damaging |
| rs1356141763 | 0 | Deleterious | 0.997 | Probably Damaging |
| rs527726480 | 0.1 | Tolerated | 0.999 | Probably Damaging |
| rs773256580 | 0 | Deleterious | 1 | Probably Damaging |
| rs534094626 | 0 | Deleterious | 0 | Benign |
| rs181856591 | 0 | Deleterious | 0.999 | Probably Damaging |
| rs1323183090 | 0.13 | Tolerated | 0.988 | Probably Damaging |
| rs748799148 | 0 | Deleterious | 0.999 | Probably Damaging |
| rs78014899 | 0.03 | Deleterious | 0.814 | Possibly Damaging |
| rs377767415 | 0.11 | Tolerated | 0.232 | Benign |
| rs75030001 | 0.03 | Deleterious | 0.981 | Probably Damaging |
| rs377767417 | 0.01 | Deleterious | 0.787 | Possibly Damaging |
| rs77724903 | 0.01 | Deleterious | 0.952 | Probably Damaging |
| rs79658334 | 0 | Deleterious | 1 | Probably Damaging |
| rs1345166214 | 0 | Deleterious | 0.998 | Probably Damaging |
| rs200127630 | 0.12 | Tolerated | 0.015 | Benign |
| rs149891333 | 0.01 | Deleterious | 0.993 | Probably Damaging |
| rs377767424 | 0 | Deleterious | 1 | Probably Damaging |
| rs55947360 | 0.03 | Deleterious | 0.997 | Probably Damaging |
| rs794728685 | 0.43 | Tolerated | 0.975 | Probably Damaging |
| rs761130672 | 0.01 | Deleterious | 0.983 | Probably Damaging |
| rs145170911 | 0.23 | Tolerated - Low Confidence | 0.837 | Possibly Damaging |
| rs146838520 | 0 | Deleterious | 1 | Probably Damaging |
| rs373594744 | 0.09 | Tolerated | 0.999 | Probably Damaging |
| rs75234356 | 0 | Deleterious | 0.997 | Probably Damaging |
| rs78347871 | 0 | Deleterious | 0.999 | Probably Damaging |
| rs74799832 | 0 | Deleterious | 1 | Probably Damaging |
| rs1361265737 | 0 | Deleterious | 0.999 | Probably Damaging |
| rs377767432 | 0 | Deleterious | 1 | Probably Damaging |
| rs774215008 | 0 | Deleterious | 1 | Probably Damaging |
| rs745650861 | 0.01 | Deleterious | 0.999 | Probably Damaging |
| rs375414982 | 0 | Deleterious | 0.982 | Probably Damaging |
| rs758800351 | 0.01 | Deleterious | 0.801 | Possibly Damaging |
| rs368550200 | 0.12 | Tolerated | 0.345 | Benign |
| rs199718928 | 0.02 | Deleterious | 0.999 | Probably Damaging |
| rs748288493 | 0.03 | Deleterious | 0.257 | Benign |
| rs763489828 | 0.01 | Deleterious | 0.771 | Possibly Damaging |
| rs368345402 | 0.11 | Tolerated | 0.997 | Probably Damaging |
| rs1438192223 | 0 | Deleterious | 1 | Probably Damaging |
| rs372191563 | 0.02 | Deleterious | 0.998 | Probably Damaging |
| rs200021472 | 0 | Deleterious - Low Confidence | 0.662 | Possibly Damaging |
| rs79853121 | 0 | Deleterious - Low Confidence | 1 | Probably Damaging |
| rs867206631 | 0 | Deleterious - Low Confidence | 0.998 | Probably Damaging |
| rs945693739 | 0.01 | Deleterious - Low Confidence | 0.459 | Possibly Damaging |
| rs1305293392 | 0 | Deleterious - Low Confidence | 0.999 | Probably Damaging |
| rs569004816 | 0 | Deleterious - Low Confidence | 0.996 | Probably Damaging |
| rs772395752 | 0 | Deleterious - Low Confidence | 0.996 | Probably Damaging |
| rs370756353 | 0 | Deleterious - Low Confidence | 0.772 | Possibly Damaging |
| rs138010639 | 0 | Deleterious - Low Confidence | 0.935 | Probably Damaging |
| rs149513065 | 0 | Deleterious - Low Confidence | 0.983 | Probably Damaging |
| rs144730090 | 0.05 | Tolerated - Low Confidence | 0.977 | Probably Damaging |
| rs775583354 | 0 | Deleterious - Low Confidence | 0.998 | Probably Damaging |
| rs760625882 | 0 | Deleterious - Low Confidence | 0.998 | Probably Damaging |
| rs532862288 | 0.03 | Deleterious - Low Confidence | 0.403 | Benign |
